# Supplementary material for: Synthesis and sensing properties of 1,1′-disubstituted unsymmetrical ferrocene-triazole derivatives: a multichannel probe for Hg(ii) ion
Source: Royal Society of Chemistry journal article supplement (doi:10.1039/c3ra43211d), 2013-01-01
Supplement: c3ra43211d.pdf [file c3ra43211d.pdf]

## Supporting Information

*for*

# Synthesis and Sensing Properties of 1,1'-Disubstituted Unsymmetrical Ferrocene-Triazole Derivatives: A Multichannel Probe for Hg(II) Ion

Dipendu Mandal, Pranab Deb, Bijan Mondal, Arunabha Thakur, Joseph Ponniah S and  
Sundargopal Ghosh\*

Department of Chemistry, Indian Institute of Technology Madras, Chennai 600 036, India.

Phone: (+91) 44 2257 4230; Fax: (+91) 44 2257 4202

Email: [sgghosh@iitm.ac.in](mailto:sgghosh@iitm.ac.in)

### Table of contents

|                   |                                                                                                                       |       |
|-------------------|-----------------------------------------------------------------------------------------------------------------------|-------|
|                   | <sup>1</sup> H, <sup>13</sup> C and ESI-mass spectra of compounds <b>3-5</b>                                          | S4-S9 |
| <b>Figure S1.</b> | Electospray mass spectrum of [ <b>4</b> .Cu <sup>2+</sup> ].                                                          | S10   |
| <b>Figure S2.</b> | Electospray mass spectrum of [ <b>5</b> .Cu <sup>2+</sup> ].                                                          | S11   |
| <b>Figure S3.</b> | Electospray mass spectrum of [ <b>4</b> .Hg <sup>2+</sup> ].                                                          | S12   |
| <b>Figure S4.</b> | Electospray mass spectrum of [ <b>5</b> .Hg <sup>2+</sup> ].                                                          | S13   |
| <b>Figure S5.</b> | Quantitative binding data (Benesi-Hildebrand plot) for <b>4</b> (top) and <b>5</b> (bottom) with Cu <sup>2+</sup> ion | S14   |

- Figure S6.** Quantitative binding data (Benesi-Hildebrand plot) for **4** (top) and **5** (bottom) with  $\text{Hg}^{2+}$  ion. S15
- Figure S7.** Fluorescence intensity of **4** or **5** at each concentration of 2 nM at each concentration of  $\text{Hg}^{2+}$  normalized between the minimum fluorescence intensity and the maximum fluorescence intensity. S16
- Figure S8.** Bar plot representation of changes in the fluorescence spectra of **5** ( $1 \times 10^{-7}$  M) in  $\text{CH}_3\text{CN}/\text{H}_2\text{O}$  (5:5) upon addition of the several metal cations. S17
- Figure S9.** Evolution of LSV of **4** ( $1 \times 10^{-4}$  M) upon addition of  $\text{Hg}^{2+}$  up to 1 equiv with [(*n*-Bu)<sub>4</sub>N]ClO<sub>4</sub> as supporting electrolyte. Scan rate employed 0.1  $\text{Vs}^{-1}$ . S18
- Figure S10.** Evolution of DPV of **5** ( $1 \times 10^{-4}$  M) upon addition of  $\text{Hg}^{2+}$  up to 1 equiv with [(*n*-Bu)<sub>4</sub>N]ClO<sub>4</sub> as supporting electrolyte. Scan rate employed 0.1  $\text{Vs}^{-1}$ . S19
- Figure S11.** A plausible binding mode for **4** with  $\text{Hg}^{2+}$  ion. S20
- Calculated structures.** Cartesian coordinates (Å) for all computed. S21-S27
- Figure S12.** Pictorial representation of the molecular orbitals (MOs) present on different fragments of **L**: (a) HOMO of **4**; (b) LUMO of **4**; (c) HOMO of **5**; (d) LUMO of **5**. S29
- Table S1.** Distance of metal to donor center and Wiberg Bond Indices (WBI) of **4.Hg**<sup>2+</sup> and **5.Hg**<sup>2+</sup>. S30
- Table S2.** DFT calculated energies of HOMO and LUMO (eV), HOMO-LUMO gap ( $\Delta E = E_{\text{LUMO}} - E_{\text{HOMO}}$ , eV) of **4**, **5**, **4.Hg**<sup>2+</sup> and **5.Hg**<sup>2+</sup>. S31
- Figure S13.** Changes in the absorption spectra of **4** ( $1 \times 10^{-5}$  M) in  $\text{CH}_3\text{CN}/\text{H}_2\text{O}$  (5:5) upon addition of several metal cations. S32

- Figure S14.** Changes in the absorption spectra of **5** ( $1 \times 10^{-5}$  M) in CH<sub>3</sub>CN/H<sub>2</sub>O (5:5) upon addition of several metal cations. S33
- Figure S15.** Evolution of CV of **4** (top) and **5** (bottom) ( $1 \times 10^{-4}$  M) upon addition of several metal cations up to 1 equiv with [(*n*-Bu)<sub>4</sub>N]ClO<sub>4</sub> as supporting electrolyte. Scan rate employed 0.1 Vs<sup>-1</sup>. S34
- Figure S16.** Reversibility of the interaction between **5** and Hg<sup>2+</sup> by the introduction of I<sup>-</sup> to the system. Inset: Stepwise complexation/decomplexation cycles carried out in ( $1 \times 10^{-6}$  M) CH<sub>3</sub>CN/H<sub>2</sub>O, 5/5 with **5** and Hg<sup>2+</sup>. S35
- Figure S17.** <sup>1</sup>H NMR titration of **4** upon addition of increasing amount of Hg<sup>2+</sup> up to 1 equiv in CD<sub>3</sub>CN solution. S36
- Figure S18.** Evolution of the color in CH<sub>3</sub>CN solution of **5** ( $10^{-5}$  M) after addition of 5 equiv of different cations tested as perchlorate salt. S37
- Figure S19.** Job's plot for compounds **4** and **5** in presence of Cu<sup>2+</sup> ion. S38
- Figure S20.** Fluorescence emission change of **4** (2 nM) at  $\lambda_{\text{exc}} = 363$  nm (left) and **5** (2nM) at  $\lambda_{\text{exc}} = 345$  nm (right) upon addition of Hg<sup>2+</sup> ion upto 1 equiv in CH<sub>3</sub>CN/H<sub>2</sub>O (1/1). S39
- Figure S21.** ESI mass for the compound **5**. S40

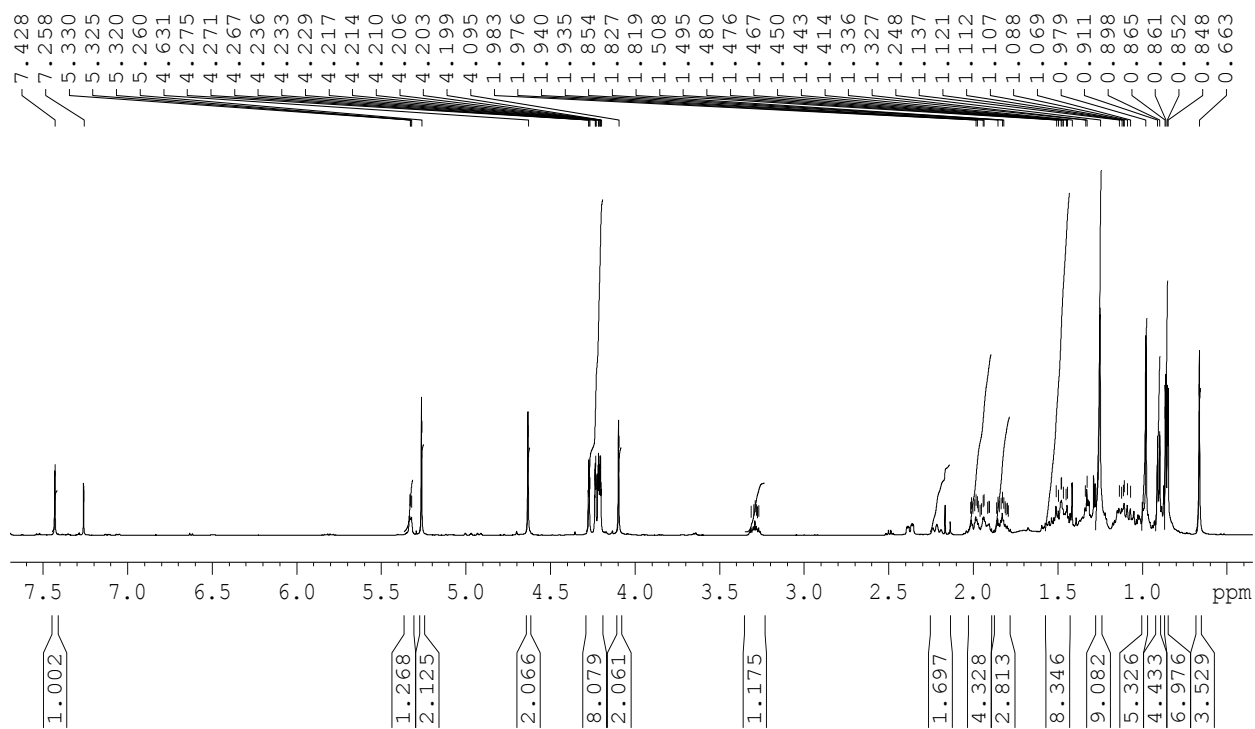

**$^1\text{H}$  NMR spectrum of 3**

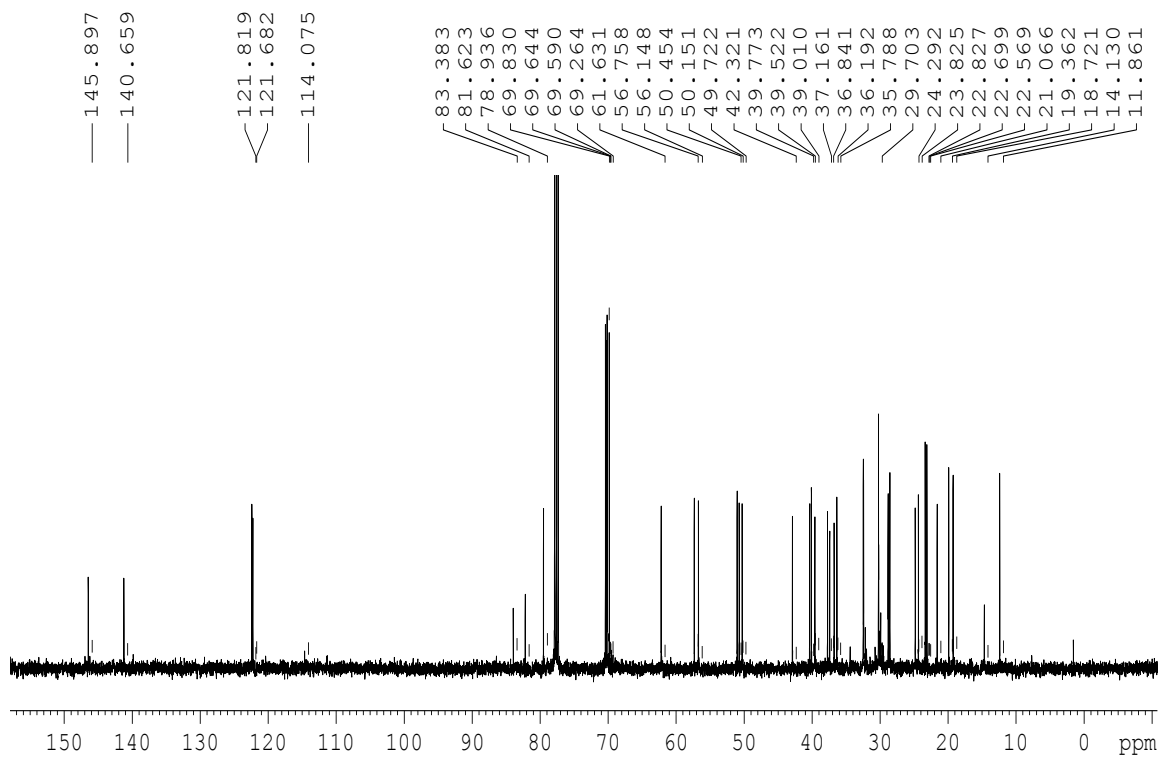

**$^{13}\text{C}$  NMR spectrum of 3**

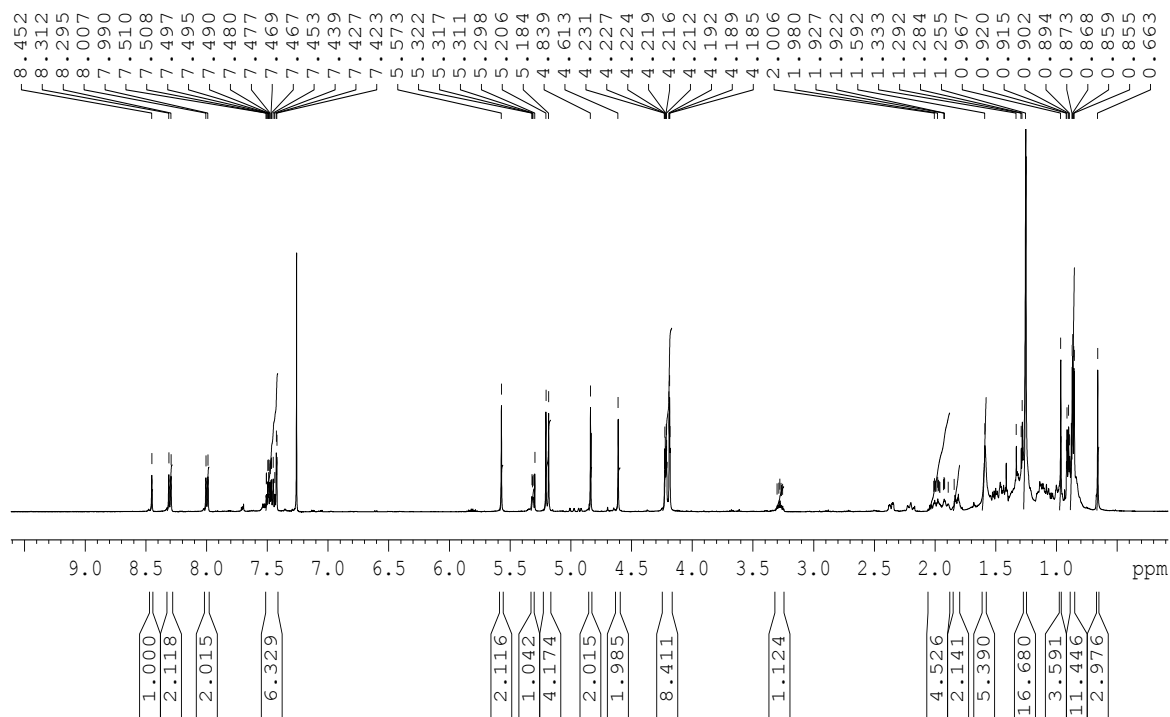

<sup>1</sup>H NMR spectrum of 4

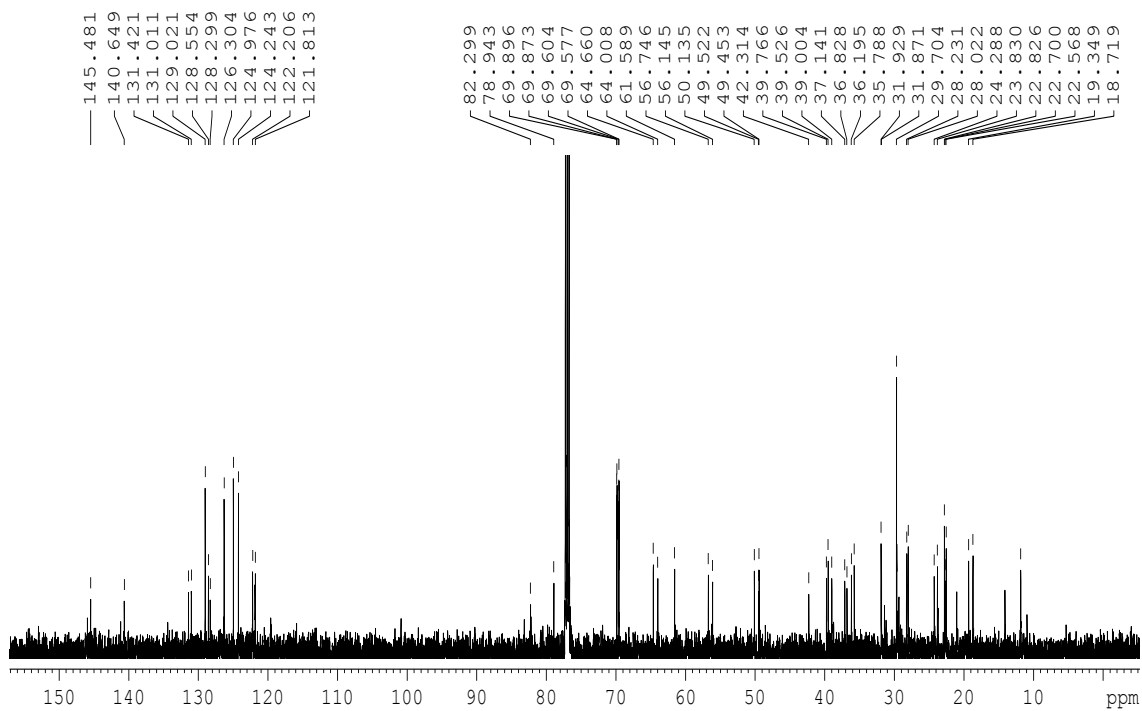

<sup>13</sup>C NMR spectrum of 4

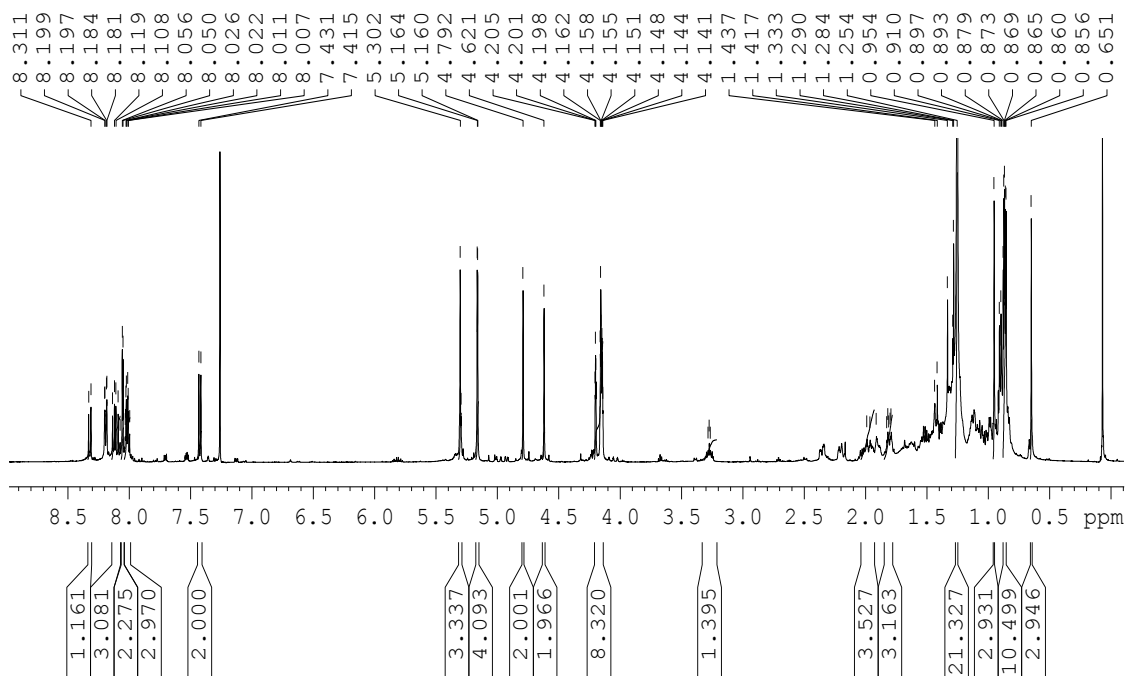

**$^1\text{H}$  NMR spectrum of 5**

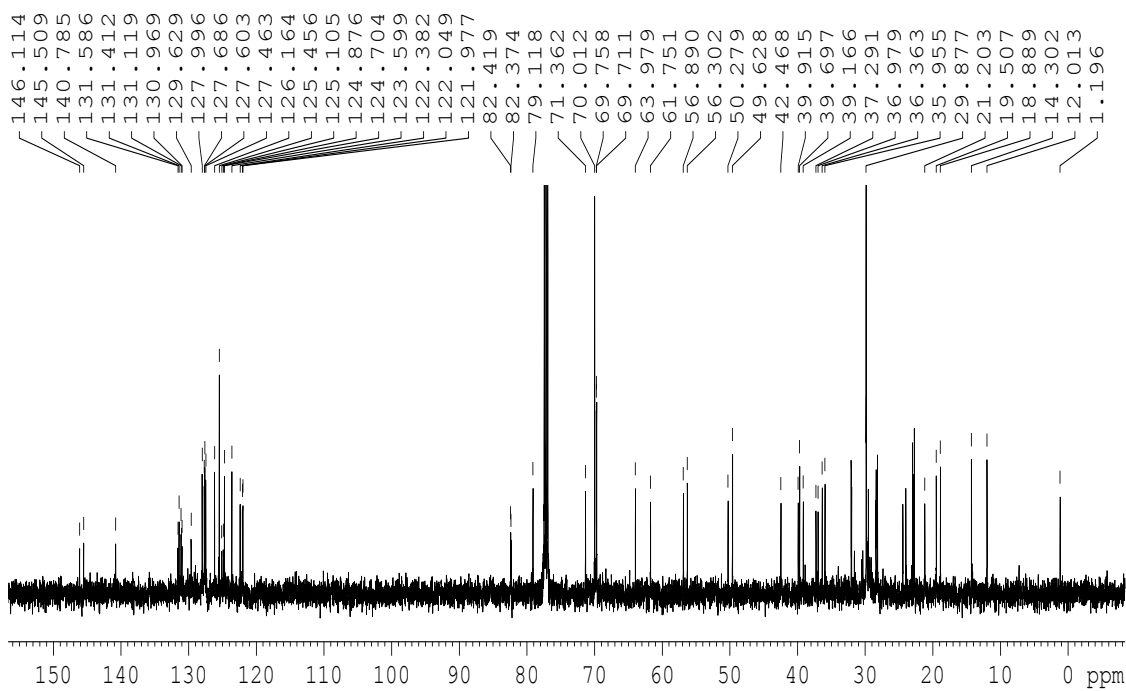

**$^{13}\text{C}$  NMR spectrum of 5**

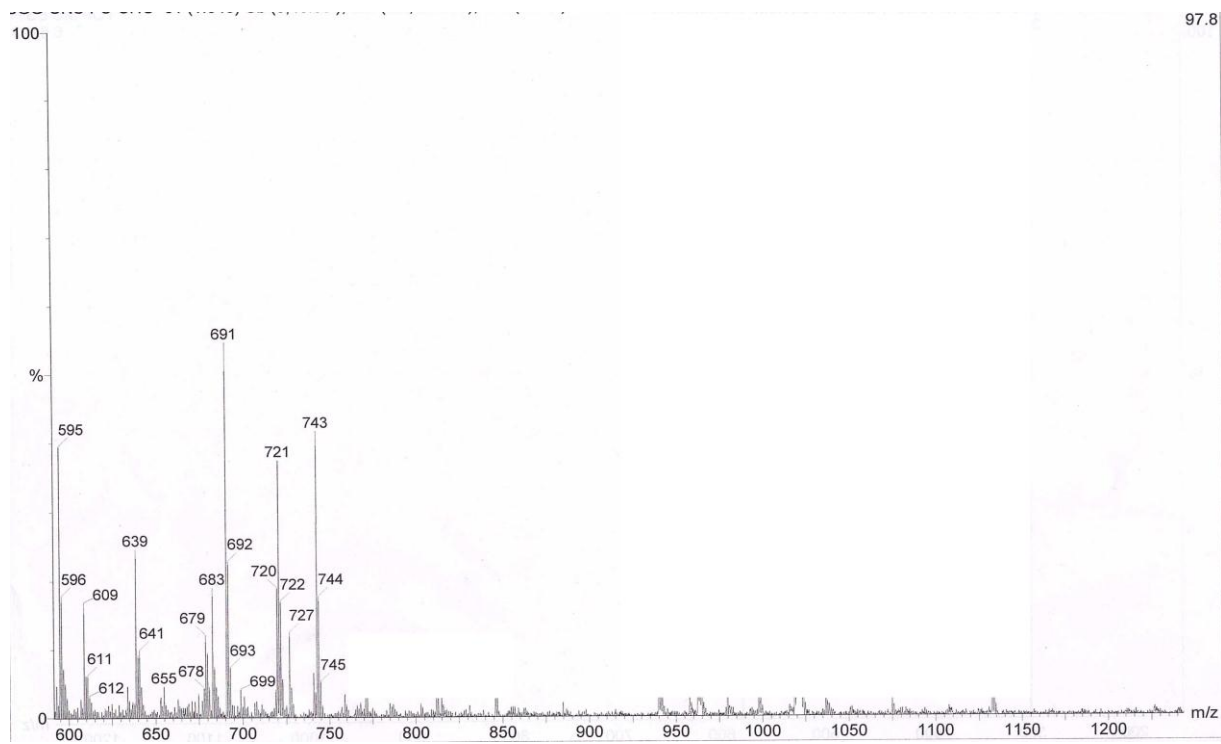

Electospray mass spectrum of **3**.

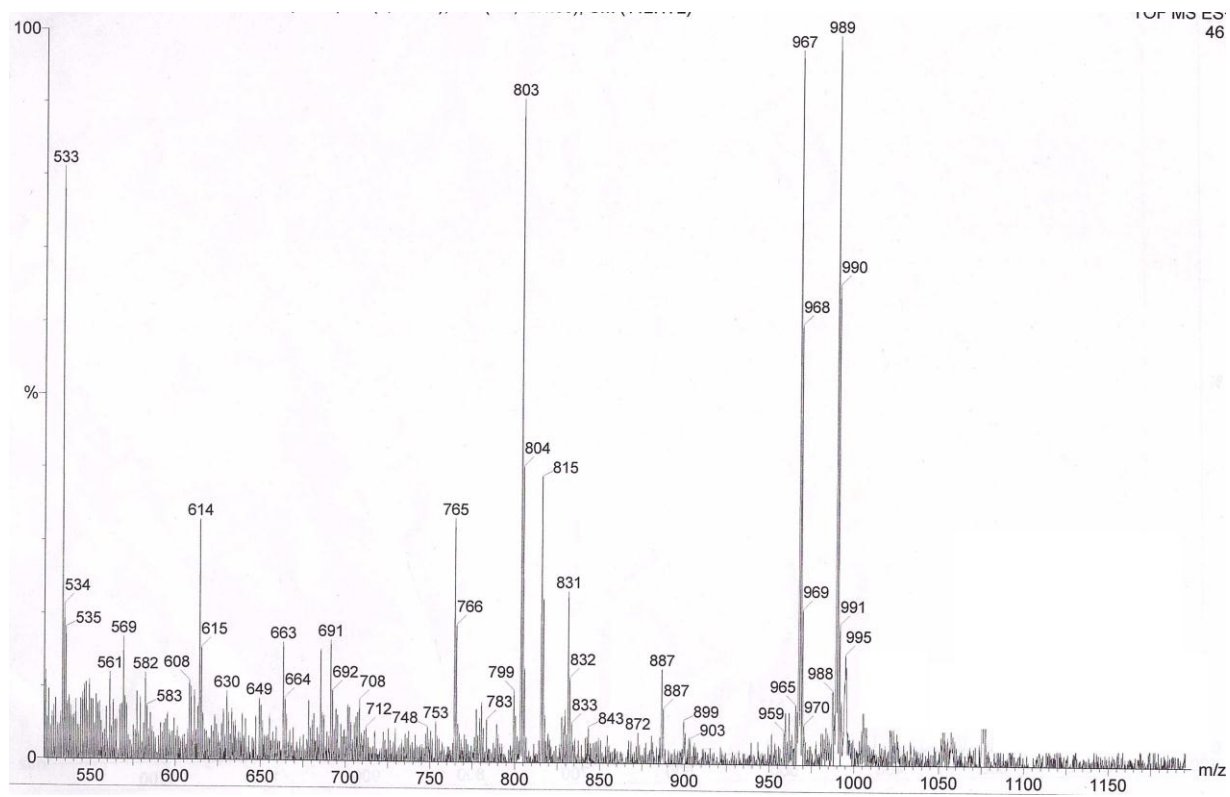

Electrospray mass spectrum of **4**.



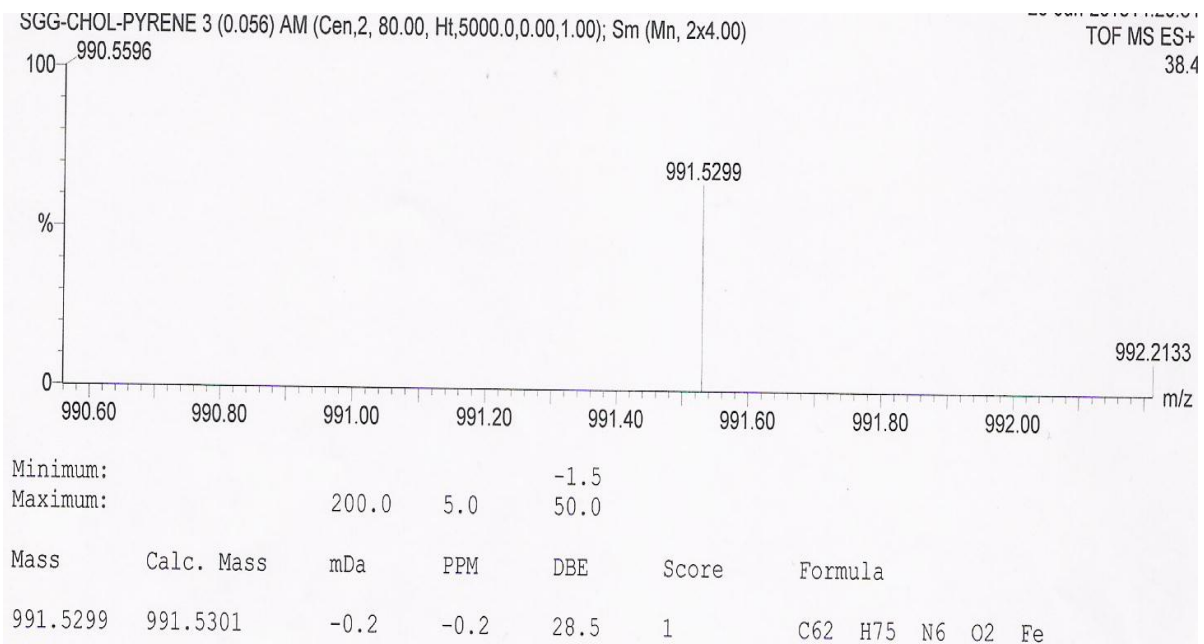

HRMS for the compound **5**

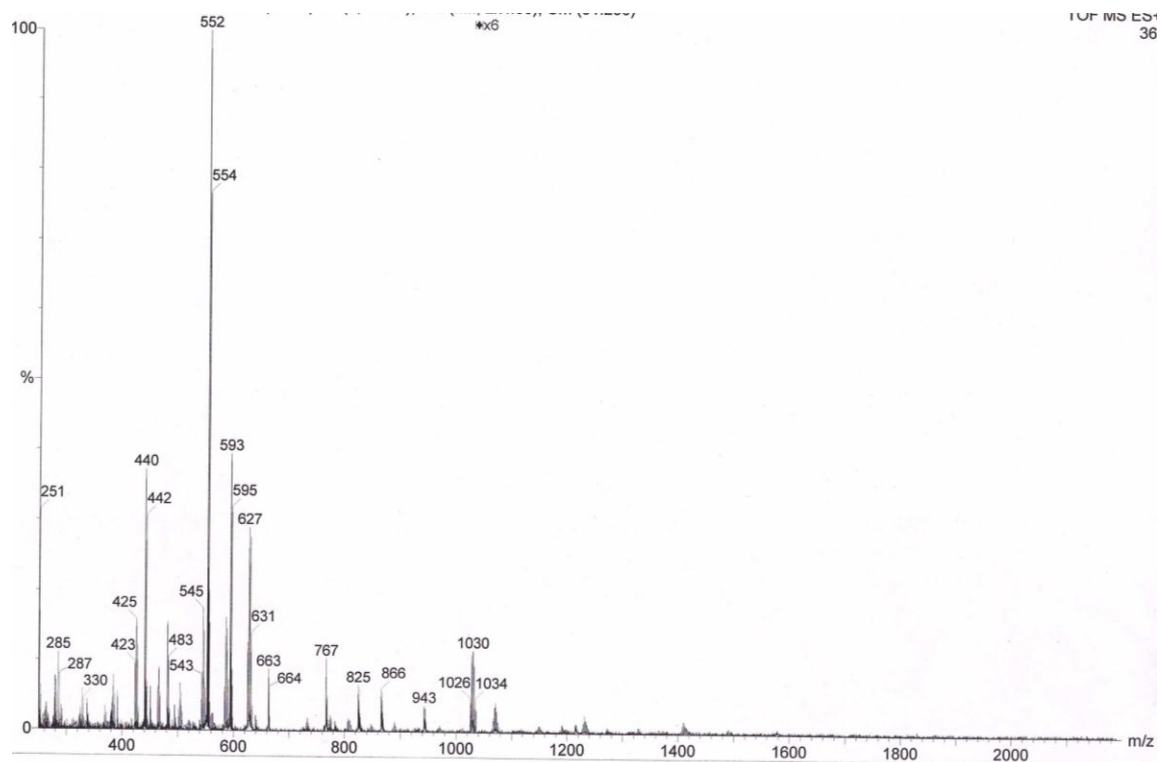

**Figure S1.** Electrospray mass spectrum of  $[4.Cu^{2+}]$

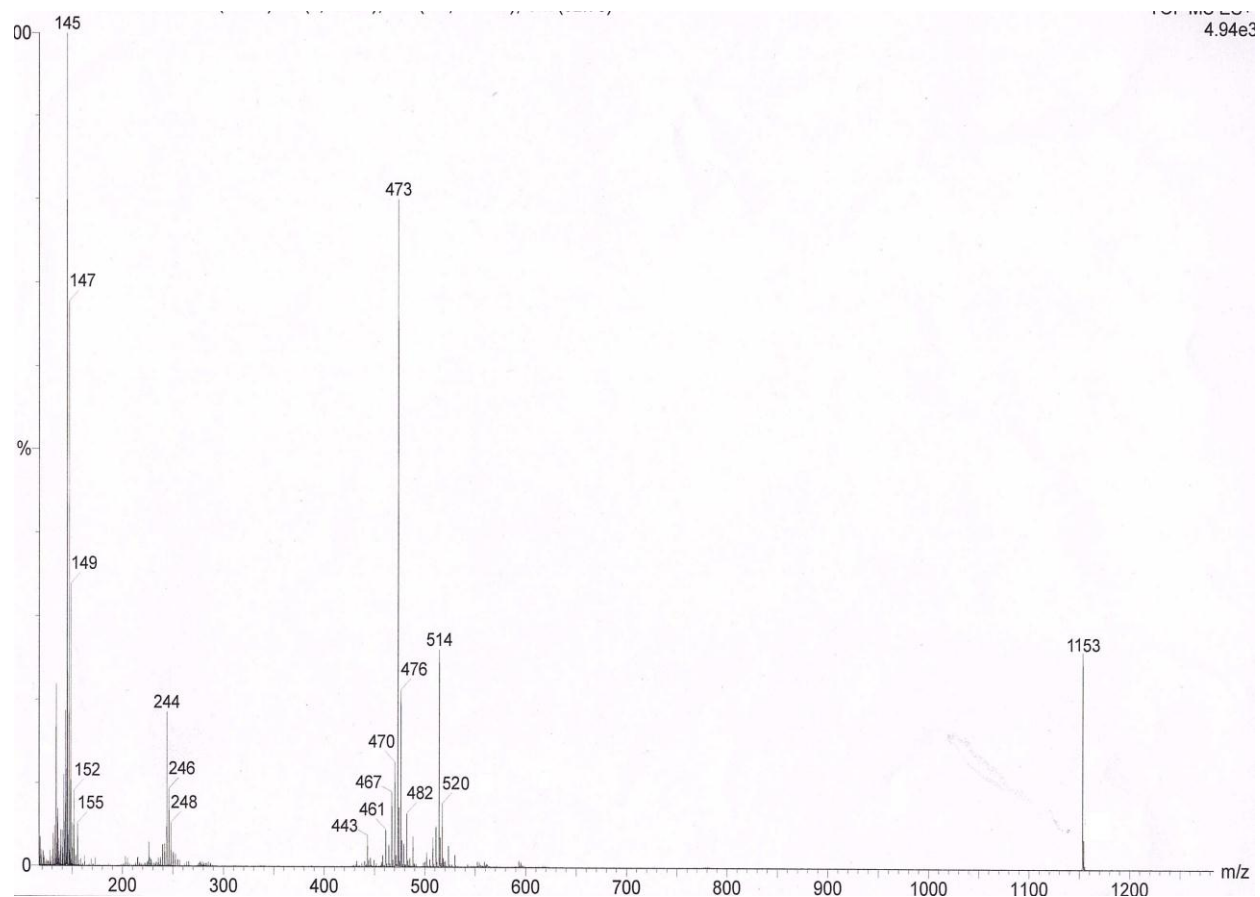

**Figure S2.** Electrospray mass spectrum of [5.Cu<sup>2+</sup>]

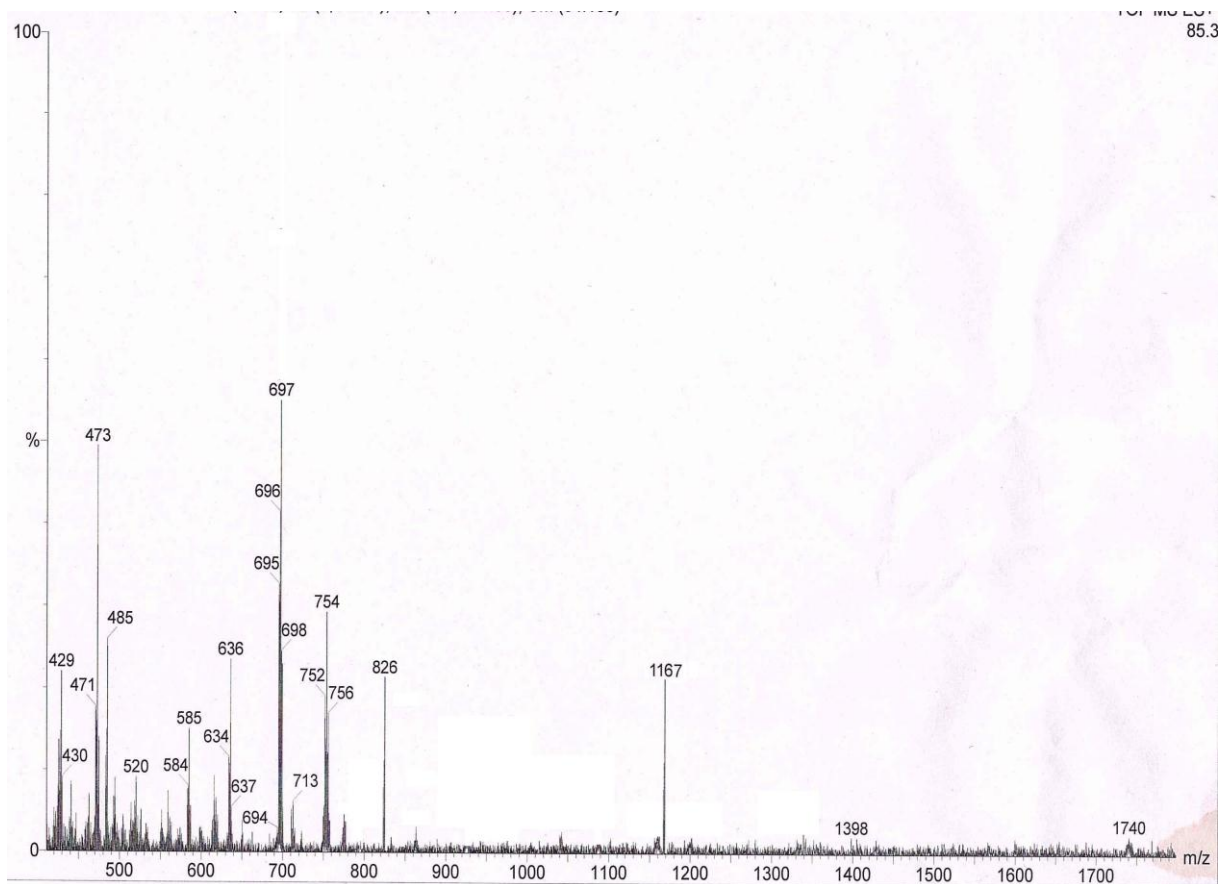

**Figure S3.** Electrospray mass spectrum of  $[4.Hg^{2+}]$

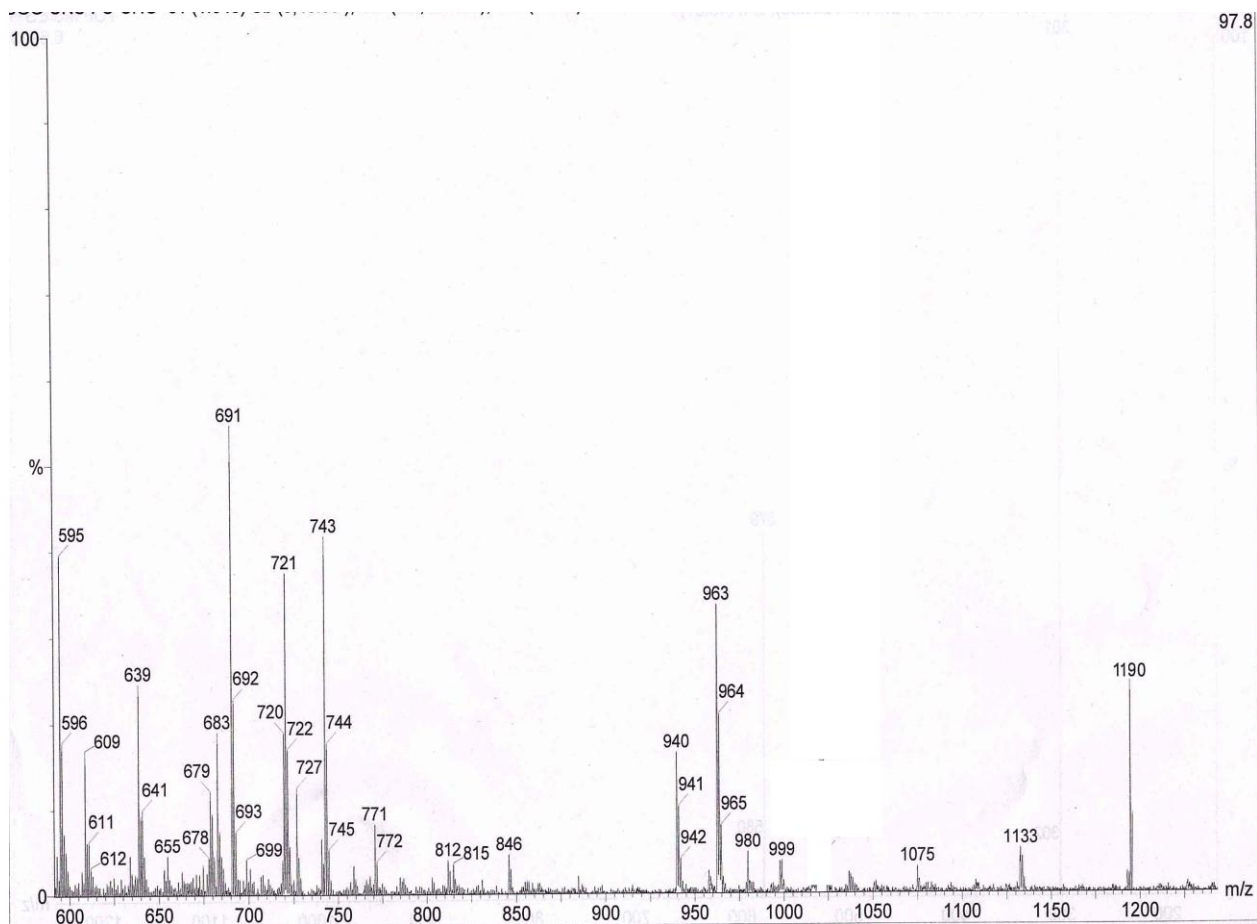

**Figure S4.** Electrospray mass spectrum of [5.Hg<sup>2+</sup>]

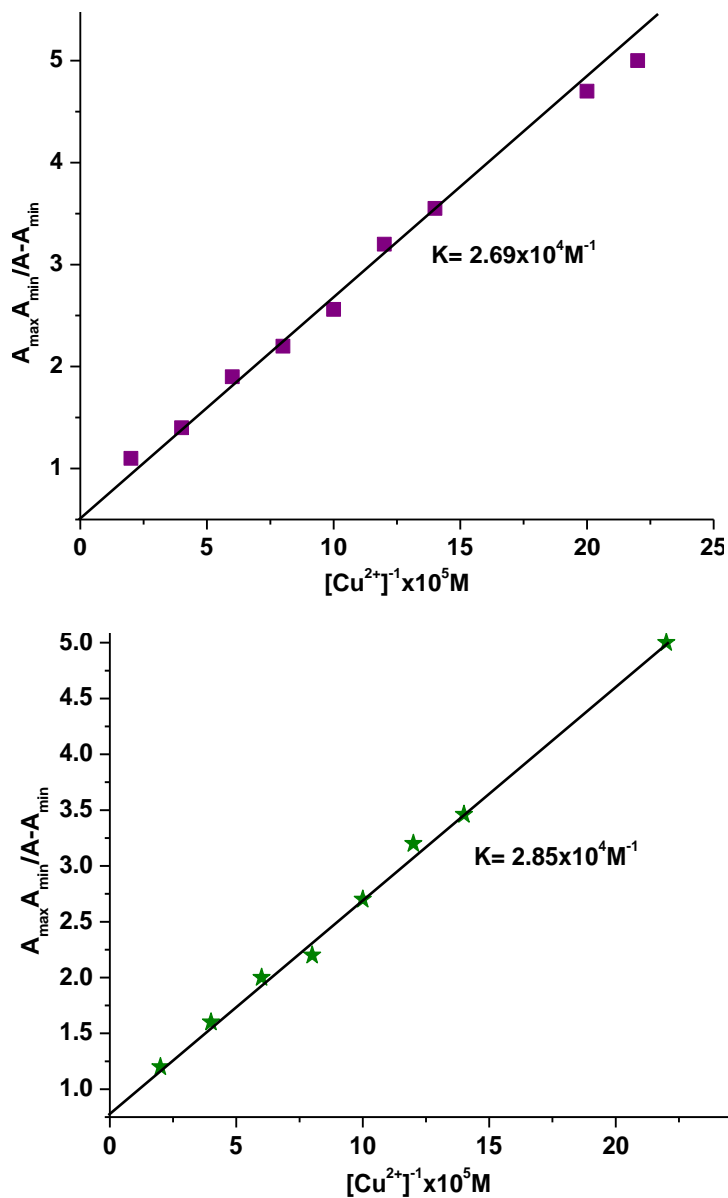

**Figure S5.** Quantitative binding data (Benesi-Hildebrand plot) for **4** (top) and **5** (bottom) with  $Cu^{2+}$  ion.

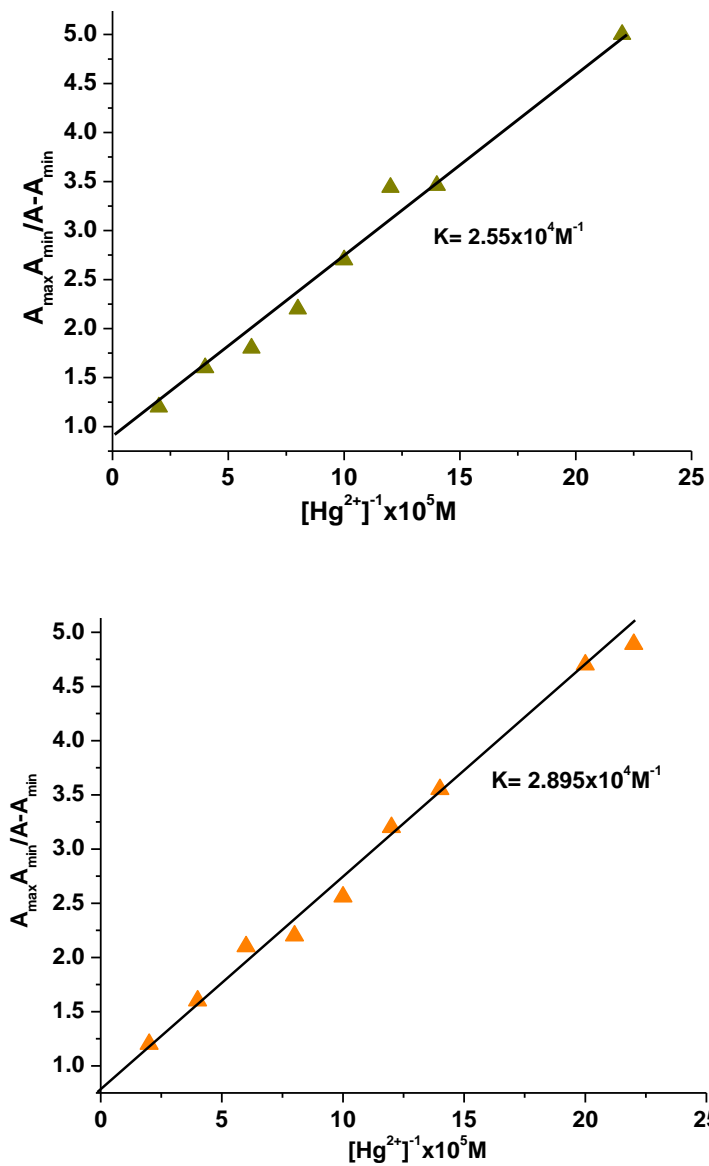

**Figure S6.** Quantitative binding data (Benesi-Hildebrand plot) for **4** (top) and **5** (bottom) with  $\text{Hg}^{2+}$  ion.

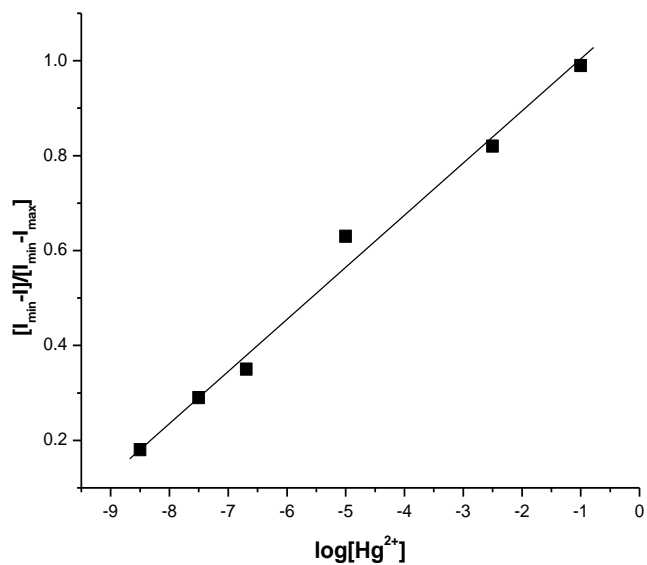

**Figure S7.** Fluorescence intensity of **4** or **5** at each concentration of 2 nM at each concentration of  $\text{Hg}^{2+}$  normalized between the minimum fluorescence intensity and the maximum fluorescence intensity.



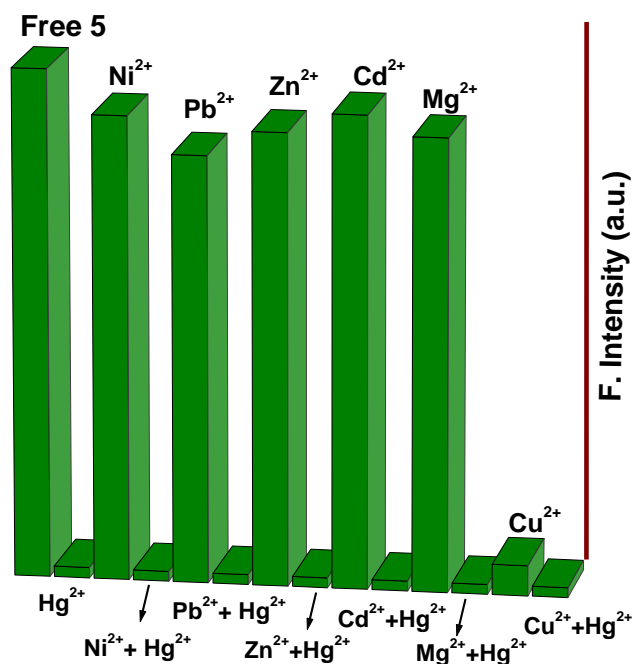

**Figure S8.** Bar plot representation of changes in fluorescence spectra of **5** ( $1 \times 10^{-7}$  M) in  $\text{CH}_3\text{CN}/\text{H}_2\text{O}$  (5:5) upon addition of the several metal cations.

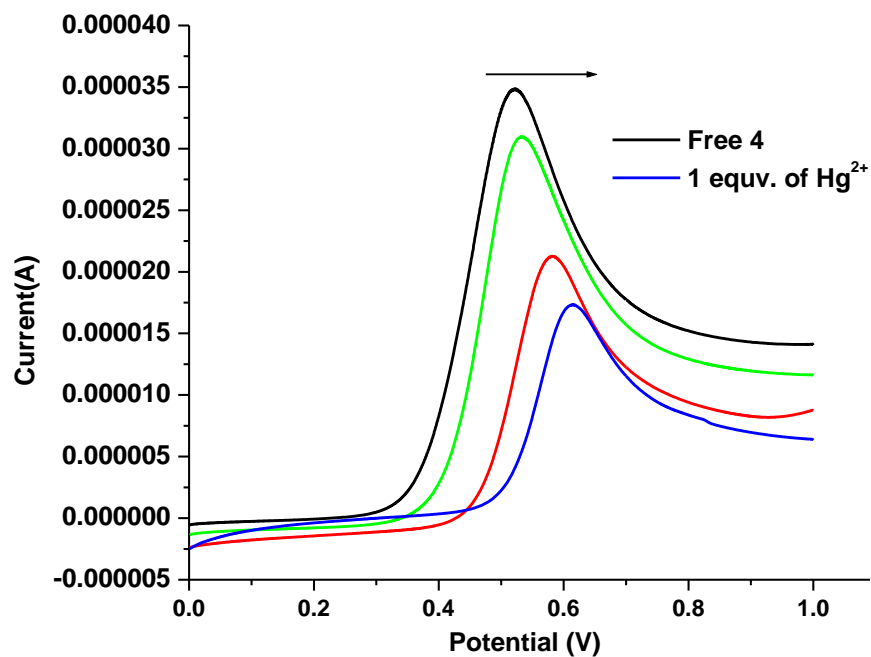

**Figure S9.** Evolution of LSV of **4** ( $1 \times 10^{-4}$  M) upon addition of  $\text{Hg}^{2+}$  up to 1 equiv with  $[(n\text{-Bu})_4\text{N}]\text{ClO}_4$  as supporting electrolyte. Scan rate employed  $0.1 \text{ Vs}^{-1}$ .

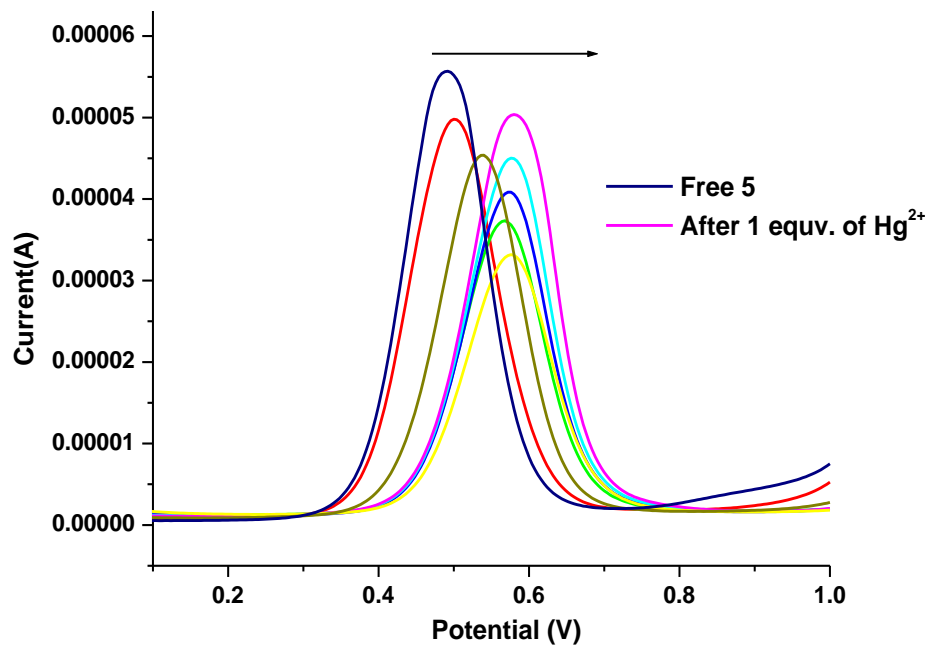

**Figure S10.** Evolution of DPV of **5** ( $1 \times 10^{-4}$  M) upon addition of  $\text{Hg}^{2+}$  up to 1 equiv with  $[(n\text{-Bu})_4\text{N}]\text{ClO}_4$  as supporting electrolyte. Scan rate employed  $0.1 \text{ Vs}^{-1}$ .

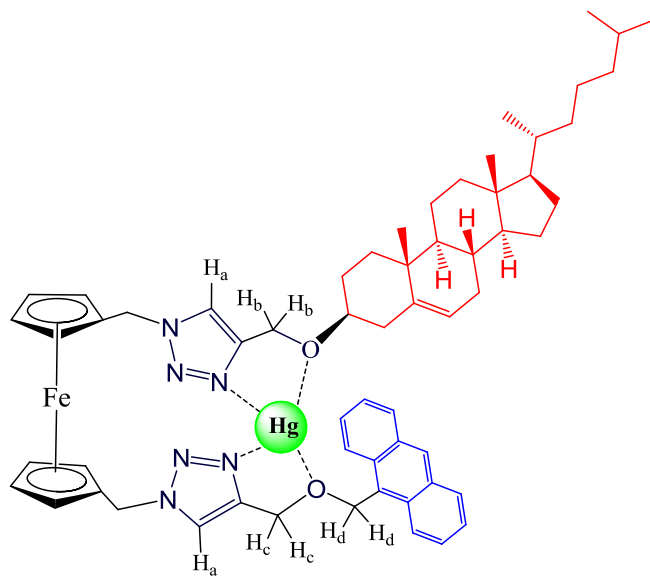

**Figure S11.** A plausible binding mode for **4** with Hg<sup>2+</sup> ion.

Cartesian coordinates for the calculated structure of ligand **4** (in Å).

|    |             |             |             |   |             |             |             |
|----|-------------|-------------|-------------|---|-------------|-------------|-------------|
| Fe | 4.82936200  | -0.95023500 | -1.67721600 | H | 5.68991100  | -1.94344500 | 1.49366100  |
| C  | 3.23574900  | -0.39025600 | -2.85945900 | C | 11.84588400 | 0.22226700  | 1.44606900  |
| H  | 3.28312300  | 0.39212700  | -3.60393900 | H | 11.15376200 | -0.47697100 | 0.97020800  |
| C  | 6.27790800  | -0.78778400 | -0.22234600 | H | 12.62484900 | -0.39078400 | 1.92237200  |
| C  | 6.16046400  | 0.43906200  | -0.94027300 | C | 15.32029600 | 2.48026400  | 2.44991600  |
| H  | 5.87660900  | 1.39412800  | -0.51830100 | H | 15.71838200 | 2.41823200  | 3.45804500  |
| C  | 6.43423400  | 0.17920500  | -2.30847500 | C | 10.71401000 | 0.67407400  | -1.28002500 |
| H  | 6.38524300  | 0.89952200  | -3.11306900 | H | 10.15075500 | 0.06288500  | -0.58544700 |
| C  | 6.63578100  | -1.80262500 | -1.15699400 | C | 15.48411100 | 3.39134000  | 0.22579900  |
| H  | 6.78228400  | -2.84865100 | -0.92407000 | H | 15.97561900 | 4.00967800  | -0.52017300 |
| O  | 11.17275600 | 0.98072200  | 2.44087300  | C | 15.98794600 | 3.28532000  | 1.48464900  |
| C  | 14.29373500 | 2.69645900  | -0.15110400 | H | 16.89236600 | 3.81757600  | 1.76213800  |
| N  | 7.38767800  | -0.93773200 | 1.97103300  | C | 12.06432600 | 2.28754300  | -3.12185100 |
| C  | 13.62859600 | 1.86604200  | 0.80889800  | H | 12.59878500 | 2.91969700  | -3.82555800 |
| C  | 6.72908400  | -1.20619700 | -2.44151600 | C | 10.91802000 | 1.65478900  | -3.48613900 |
| H  | 6.94155600  | -1.72419300 | -3.36641100 | H | 10.52008400 | 1.76952500  | -4.48963200 |
| C  | 11.92642700 | 1.30843700  | -0.84968500 | C | 10.23066600 | 0.84100700  | -2.54210000 |
| C  | 14.18554200 | 1.79965400  | 2.12673600  | H | 9.30607500  | 0.35023900  | -2.82884100 |
| H  | 13.66947500 | 1.22744300  | 2.88714600  | C | 10.52722100 | 0.17567400  | 3.40516100  |
| C  | 12.47082500 | 1.15344600  | 0.43947900  | H | 10.29758800 | 0.84764700  | 4.23762400  |
| N  | 8.94595100  | -1.75476600 | 3.16998400  | H | 11.19091300 | -0.61409700 | 3.78459500  |
| C  | 3.40684600  | -2.43905600 | -1.82889500 | C | 2.70783000  | -1.79245900 | 0.58864400  |
| H  | 3.58179000  | -3.49077300 | -1.64755500 | N | 1.40159100  | -2.41566700 | 0.74764300  |
| C  | 12.60071300 | 2.14599400  | -1.80402600 | H | 3.41692400  | -2.50940300 | 1.00518100  |
| C  | 9.27649300  | -0.46730100 | 2.88690900  | N | 1.32367400  | -3.74524800 | 0.89136700  |
| N  | 7.80455500  | -2.03397100 | 2.62073500  | C | 0.16648100  | -1.86488200 | 0.69293400  |
| C  | 13.76757400 | 2.80741500  | -1.43524700 | N | 0.06648900  | -4.06292300 | 0.93966200  |
| H  | 14.27711200 | 3.43066700  | -2.16608100 | C | -0.68007000 | -2.93481200 | 0.82209000  |
| C  | 2.91119300  | -0.21816900 | -1.48819200 | H | -0.01376600 | -0.80982000 | 0.57123900  |
| H  | 2.65769000  | 0.71669900  | -1.00582700 | C | -2.17215700 | -2.95778600 | 0.84785400  |
| C  | 3.02191200  | -1.48482200 | -0.84370900 | H | -2.54140900 | -3.64942300 | 0.07788500  |
| C  | 8.27910300  | 0.06860600  | 2.10786300  | H | -2.52863300 | -3.33790100 | 1.81812700  |
| H  | 8.15036400  | 1.03879800  | 1.65478400  | H | 2.73550400  | -0.88531900 | 1.19864300  |
| C  | 3.53907600  | -1.76333100 | -3.06924100 | O | -2.62831800 | -1.64270800 | 0.63505200  |
| H  | 3.85763600  | -2.20689300 | -4.00220300 | C | -4.02631400 | -1.46364400 | 0.78367900  |
| C  | 6.11757200  | -0.96877400 | 1.25478600  | C | -4.28114200 | 0.02682800  | 0.92758000  |
| H  | 5.46385100  | -0.19602600 | 1.67049900  | C | -4.81040800 | -2.01377500 | -0.41040500 |

|   |              |             |             |   |              |             |             |
|---|--------------|-------------|-------------|---|--------------|-------------|-------------|
| H | -4.35984400  | -1.97790900 | 1.70053300  | C | -12.92421100 | -0.83520400 | -0.43385400 |
| C | -5.77542100  | 0.31700500  | 1.06929100  | H | -11.62658100 | -2.61797500 | -0.54830000 |
| H | -3.86117500  | 0.53525500  | 0.05164900  | H | -11.47359100 | -1.53677700 | -1.92444600 |
| H | -3.73842200  | 0.40416900  | 1.80056800  | H | -12.47748600 | 0.29615200  | 1.36259600  |
| C | -6.28466200  | -1.68545600 | -0.32545300 | C | -13.53506200 | 1.62006700  | 0.05764200  |
| H | -4.68620800  | -3.09786900 | -0.49232400 | H | -9.98733000  | 1.25799900  | -2.02477200 |
| H | -4.36237600  | -1.57653100 | -1.31286100 | H | -11.30476900 | 2.33568800  | -1.57962300 |
| C | -6.65159500  | -0.21987800 | -0.09226500 | H | -11.65450000 | 0.75522500  | -2.27453500 |
| H | -5.92360700  | 1.39689400  | 1.17077500  | H | -13.53750600 | -1.45756900 | 0.22304200  |
| H | -6.12957500  | -0.13516500 | 2.00516200  | H | -13.54006300 | -0.61780900 | -1.31360100 |
| C | -7.19533000  | -2.65060700 | -0.44996000 | C | -14.91969700 | 1.18834900  | 0.57871000  |
| C | -8.14993600  | -0.09957500 | 0.31937200  | H | -13.63001500 | 1.77978000  | -1.02624800 |
| C | -6.34839000  | 0.57817700  | -1.37746000 | C | -13.11353300 | 2.94554800  | 0.69942300  |
| C | -8.67907700  | -2.44336000 | -0.42220500 | H | -15.14725700 | 0.18136100  | 0.21277000  |
| H | -6.85272000  | -3.67555200 | -0.58785800 | H | -14.87642000 | 1.10925300  | 1.67490700  |
| C | -9.07737700  | -0.97185900 | -0.55220000 | C | -16.08145800 | 2.10233100  | 0.18231400  |
| C | -8.64576200  | 1.35544500  | 0.40705800  | H | -12.90603100 | 2.81333300  | 1.76798600  |
| H | -8.21889500  | -0.52183300 | 1.33463600  | H | -12.21714200 | 3.36173600  | 0.23572100  |
| H | -6.40872700  | 1.65646600  | -1.20348800 | H | -13.89929200 | 3.69999900  | 0.60630400  |
| H | -5.34351300  | 0.36859100  | -1.75149700 | C | -17.43312000 | 1.56143300  | 0.65080700  |
| H | -7.04871300  | 0.32090900  | -2.17744000 | H | -16.09604300 | 2.21291500  | -0.91136900 |
| H | -9.08480800  | -2.85207700 | 0.51658900  | H | -15.92872700 | 3.10655800  | 0.59028900  |
| H | -9.14637100  | -3.03236100 | -1.22116300 | H | -17.54345800 | 0.52976200  | 0.28983800  |
| C | -10.52911300 | -0.76574800 | -0.12698600 | H | -17.43926000 | 1.49925500  | 1.74884800  |
| H | -8.96215300  | -0.68261400 | -1.60524400 | C | -18.65489400 | 2.36939100  | 0.19303400  |
| C | -10.12884700 | 1.49045100  | 0.78321500  | C | -19.94642400 | 1.64652900  | 0.57965100  |
| H | -8.48273500  | 1.86252100  | -0.54911500 | H | -18.61949100 | 2.43460300  | -0.90413200 |
| H | -8.04876600  | 1.90466300  | 1.14283100  | C | -18.65520600 | 3.79433700  | 0.75074600  |
| C | -11.03152400 | 0.69500100  | -0.17090800 | H | -20.82855400 | 2.18964100  | 0.22457600  |
| C | -11.62150300 | -1.56359000 | -0.83875500 | H | -19.98049800 | 0.63635000  | 0.15799100  |
| H | -10.57454600 | -1.05375500 | 0.93647700  | H | -20.02941300 | 1.55516600  | 1.66934200  |
| H | -10.28302600 | 1.11654400  | 1.80487800  | H | -18.65133500 | 3.78019600  | 1.84759400  |
| H | -10.38778400 | 2.55280300  | 0.79950800  | H | -17.78350300 | 4.36671700  | 0.42086800  |
| C | -12.51004800 | 0.48855000  | 0.27944100  | H | -19.54885600 | 4.33990400  | 0.42981100  |
| C | -10.98864200 | 1.28796900  | -1.58933500 |   |              |             |             |

Cartesian coordinates for the calculated structure of ligand **5** (in Å).

|    |             |             |             |   |              |             |             |
|----|-------------|-------------|-------------|---|--------------|-------------|-------------|
| Fe | 4.29622400  | 1.40018200  | 1.73142700  | C | -0.45803300  | 2.24419900  | -0.48436700 |
| C  | 2.75714100  | 0.70099100  | 2.91257200  | N | -0.67981000  | 4.44614400  | -0.54867300 |
| H  | 2.85282200  | -0.12548500 | 3.60288300  | C | -1.36280100  | 3.27308900  | -0.51345800 |
| C  | 5.71065300  | 1.40934800  | 0.23766500  | H | -0.57941200  | 1.17447000  | -0.44662100 |
| C  | 5.65982100  | 0.12620700  | 0.85858000  | C | -2.85421900  | 3.21659300  | -0.51875300 |
| H  | 5.40147100  | -0.80348500 | 0.36865600  | H | -3.24745600  | 3.83741500  | 0.29808800  |
| C  | 5.96033700  | 0.28935100  | 2.23609300  | H | -3.24602200  | 3.63691900  | -1.45839600 |
| H  | 5.96217300  | -0.49278400 | 2.98230900  | H | 2.14401400   | 1.44147300  | -1.09386200 |
| C  | 6.05437000  | 2.36119200  | 1.24133900  | O | -3.23688500  | 1.86802000  | -0.38469300 |
| H  | 6.15528600  | 3.42720000  | 1.08830800  | C | -4.62049500  | 1.61965000  | -0.56380500 |
| O  | 10.63654500 | 0.07000100  | -2.40203600 | C | -4.79254300  | 0.12395100  | -0.76375500 |
| N  | 6.79234800  | 1.78917100  | -1.93276000 | C | -5.45336800  | 2.08418000  | 0.63351400  |
| C  | 6.20512400  | 1.66993000  | 2.47138900  | H | -4.96633200  | 2.14776900  | -1.46836600 |
| H  | 6.42306100  | 2.12123100  | 3.42925600  | C | -6.26652600  | -0.23843500 | -0.94610700 |
| N  | 8.32599500  | 2.78247700  | -3.02574400 | H | -4.36267100  | -0.39254000 | 0.10258900  |
| C  | 2.82233000  | 2.81750200  | 2.01571800  | H | -4.21462100  | -0.19337600 | -1.63807100 |
| H  | 2.95153400  | 3.88498100  | 1.90006800  | C | -6.90652400  | 1.68359400  | 0.50675000  |
| C  | 8.73164900  | 1.50299700  | -2.81528300 | H | -5.38706000  | 3.16955800  | 0.75677600  |
| N  | 7.15405400  | 2.95121500  | -2.49499700 | H | -4.99981300  | 1.63719600  | 1.52848000  |
| C  | 2.40325900  | 0.60560400  | 1.54110300  | C | -7.19209100  | 0.21023200  | 0.21463300  |
| H  | 2.17171300  | -0.30521500 | 1.00460400  | H | -6.35535600  | -1.32029900 | -1.08783500 |
| C  | 2.44853700  | 1.91486800  | 0.97911600  | H | -6.62642100  | 0.22751100  | -1.87299500 |
| C  | 7.75100000  | 0.85331600  | -2.10633700 | C | -7.86870300  | 2.59518700  | 0.64660600  |
| H  | 7.67716500  | -0.14959100 | -1.71726100 | C | -8.67394200  | 0.02806500  | -0.23236500 |
| C  | 3.01361700  | 2.06835900  | 3.20512300  | C | -6.87299700  | -0.61719900 | 1.47728500  |
| H  | 3.33997900  | 2.46276900  | 4.15727600  | C | -9.33872100  | 2.31270900  | 0.58114200  |
| C  | 5.52378000  | 1.69755400  | -1.21932700 | H | -7.58299000  | 3.63075300  | 0.82780000  |
| H  | 4.90974100  | 0.92518800  | -1.69229400 | C | -9.66107000  | 0.81866900  | 0.65148500  |
| H  | 5.04369700  | 2.66378000  | -1.38011500 | C | -9.09075100  | -1.44635900 | -0.38187900 |
| C  | 11.19740700 | 0.70988000  | -1.26567300 | H | -8.74611100  | 0.48346700  | -1.23296000 |
| H  | 10.44402800 | 1.33728800  | -0.77280900 | H | -6.87077000  | -1.68995300 | 1.26324100  |
| H  | 12.01220400 | 1.37545200  | -1.59155200 | H | -5.88928500  | -0.36784100 | 1.88189300  |
| C  | 10.04300000 | 0.97442800  | -3.31118100 | H | -7.60326100  | -0.42787500 | 2.26944100  |
| H  | 9.90798400  | 0.40910700  | -4.23824000 | H | -9.74804900  | 2.73344700  | -0.35074000 |
| H  | 10.70495100 | 1.82391900  | -3.53072400 | H | -9.85124600  | 2.84717500  | 1.39064300  |
| C  | 2.08486300  | 2.30207500  | -0.42186700 | C | -11.09263800 | 0.55215500  | 0.19265600  |
| N  | 0.74466500  | 2.86435100  | -0.51119000 | H | -9.54799800  | 0.49837500  | 1.69570500  |
| H  | 2.74667000  | 3.08183800  | -0.80163800 | C | -10.55742000 | -1.64418700 | -0.79283000 |
| N  | 0.59326200  | 4.19487400  | -0.54449400 | H | -8.91893600  | -1.97850000 | 0.55898400  |

|   |              |             |             |   |              |             |             |
|---|--------------|-------------|-------------|---|--------------|-------------|-------------|
| H | -8.45206200  | -1.93641500 | -1.12442600 | H | -19.00105600 | -3.16970600 | 0.64567600  |
| C | -11.51761200 | -0.93356000 | 0.17227700  | C | -18.94926100 | -4.36266600 | -1.13295200 |
| C | -12.23711000 | 1.26405300  | 0.91377500  | H | -21.21060700 | -2.93754100 | -0.48560700 |
| H | -11.13602700 | 0.87774900  | -0.85997500 | H | -20.45146200 | -1.35412500 | -0.25581300 |
| H | -10.71254800 | -1.24038500 | -1.80290700 | H | -20.43529600 | -2.12173400 | -1.85004100 |
| H | -10.75906100 | -2.71735600 | -0.85373200 | H | -18.93720700 | -4.24213600 | -2.22320300 |
| C | -12.99724700 | -0.78608200 | -0.29767300 | H | -18.05105800 | -4.91824300 | -0.84835700 |
| C | -11.46816400 | -1.57845800 | 1.56776200  | H | -19.81512600 | -4.98286200 | -0.87825000 |
| C | -13.49272400 | 0.48269100  | 0.46170300  | C | 11.70420800  | -0.32161700 | -0.29383800 |
| H | -12.29421000 | 2.32652100  | 0.66073200  | C | 12.76579200  | -1.18440900 | -0.62647800 |
| H | -12.10416100 | 1.20607100  | 2.00014300  | C | 11.12752900  | -0.40472500 | 0.96978300  |
| H | -12.95605600 | -0.54622000 | -1.37103100 | C | 13.23967700  | -2.11017200 | 0.34152600  |
| C | -13.96537900 | -1.97734500 | -0.14270300 | C | 13.40368300  | -1.16231900 | -1.91775300 |
| H | -10.47912400 | -1.50801200 | 2.02611500  | C | 11.57977400  | -1.31131100 | 1.91777100  |
| H | -11.72215300 | -2.64152400 | 1.51034200  | H | 10.30574400  | 0.26160100  | 1.21768600  |
| H | -12.17749600 | -1.11307100 | 2.25840400  | C | 14.32876100  | -2.98084100 | 0.03143200  |
| H | -14.13214900 | 1.09639300  | -0.17821800 | C | 12.63717300  | -2.17229900 | 1.62645600  |
| H | -14.10578900 | 0.19547200  | 1.32320400  | C | 14.43709000  | -1.98522100 | -2.20748000 |
| C | -15.36246100 | -1.59146500 | -0.66590900 | H | 13.01632100  | -0.48971800 | -2.67274800 |
| H | -14.06713200 | -2.19036300 | 0.93138300  | H | 11.11279600  | -1.35352200 | 2.89763800  |
| C | -13.46619700 | -3.24941700 | -0.83424100 | C | 14.94252800  | -2.92505900 | -1.24601700 |
| H | -15.65541500 | -0.62764200 | -0.23569300 | C | 14.80430200  | -3.90411400 | 1.00009700  |
| H | -15.30209600 | -1.43196700 | -1.75253400 | C | 13.13823800  | -3.11939000 | 2.58678900  |
| C | -16.47707300 | -2.59555000 | -0.36338200 | H | 14.90286500  | -1.95425800 | -3.18854200 |
| H | -13.26069600 | -3.06277400 | -1.89510300 | C | 16.00890300  | -3.78312400 | -1.53037100 |
| H | -12.54980500 | -3.63090600 | -0.38017200 | C | 15.87234600  | -4.74356400 | 0.67539400  |
| H | -14.20734600 | -4.05104300 | -0.77670500 | C | 14.16771900  | -3.94255100 | 2.28979800  |
| C | -17.85144800 | -2.08769700 | -0.80204300 | H | 12.66596500  | -3.15568500 | 3.56447700  |
| H | -16.49568100 | -2.80049300 | 0.71656200  | C | 16.46813200  | -4.68246100 | -0.57818500 |
| H | -16.26800300 | -3.55136500 | -0.85389300 | H | 16.47641300  | -3.73833900 | -2.50991800 |
| H | -18.02280800 | -1.10132800 | -0.34978400 | H | 16.23509600  | -5.44873700 | 1.41790800  |
| H | -17.84903700 | -1.92490900 | -1.88978100 | H | 14.53745100  | -4.65240100 | 3.02436000  |
| C | -19.03090200 | -3.00052400 | -0.44049700 | H | 17.29747800  | -5.34201600 | -0.81395200 |
| C | -20.35712600 | -2.31464400 | -0.77332400 |   |              |             |             |



Cartesian coordinates for the calculated structure of ligand **4.Hg<sup>2+</sup>** (in Å).

|    |              |             |             |   |             |             |             |
|----|--------------|-------------|-------------|---|-------------|-------------|-------------|
| Fe | -7.92672200  | -3.00602200 | -1.08714900 | H | -0.68231700 | 3.11214900  | -1.14777700 |
| C  | -7.80682000  | -5.08255900 | -0.96905600 | H | -0.62596400 | 2.94711300  | 0.61275800  |
| H  | -8.52269500  | -5.75467100 | -1.42345100 | C | -2.32611800 | 4.96888600  | 3.61383200  |
| C  | -8.29259400  | -0.94358000 | -1.23306500 | H | -2.42789300 | 4.30376400  | 4.46650400  |
| C  | -9.45941900  | -1.63565000 | -0.76394700 | C | -1.07021000 | 5.28397500  | -2.49871800 |
| H  | -9.96695400  | -1.46029900 | 0.17670600  | H | -0.88513300 | 4.24082800  | -2.72903000 |
| C  | -9.84768400  | -2.57179800 | -1.76384000 | C | -2.39242600 | 7.20488700  | 2.71629700  |
| H  | -10.67811500 | -3.26205200 | -1.69716600 | H | -2.53470300 | 8.27569200  | 2.83232600  |
| C  | -7.96063800  | -1.47350100 | -2.51834900 | C | -2.51700500 | 6.36147500  | 3.79310200  |
| H  | -7.11792100  | -1.18260600 | -3.13203000 | H | -2.76094100 | 6.75284300  | 4.77543500  |
| O  | -2.43686000  | 2.49996400  | -0.18249300 | C | -1.50839600 | 8.01600400  | -2.04171100 |
| C  | -2.06812700  | 6.69776700  | 1.42345000  | H | -1.67601500 | 9.07169500  | -1.84743000 |
| N  | -6.36924200  | 0.66715400  | -0.85400400 | C | -1.19014900 | 7.57903100  | -3.30412100 |
| C  | -1.86312300  | 5.28251400  | 1.23331200  | H | -1.10214100 | 8.28147100  | -4.12652900 |
| C  | -8.91861500  | -2.47843800 | -2.84017500 | C | -0.97017200 | 6.19743100  | -3.52648800 |
| H  | -8.91559100  | -3.09079600 | -3.73225800 | H | -0.71374400 | 5.85206400  | -4.52370400 |
| C  | -1.39881300  | 5.68735600  | -1.16938100 | C | -3.39982100 | 2.76550000  | -1.24268100 |
| C  | -2.02100900  | 4.44489200  | 2.37552500  | H | -2.89966300 | 2.64796800  | -2.21236700 |
| H  | -1.91340100  | 3.36998900  | 2.27956900  | H | -3.75885700 | 3.79293600  | -1.15567800 |
| C  | -1.50862500  | 4.79376500  | -0.06086400 | C | -6.43262100 | -3.01609500 | 1.86610700  |
| N  | -4.26357300  | 0.47837100  | -0.85060300 | N | -5.00538800 | -2.64870800 | 1.94113400  |
| C  | -6.00360900  | -3.67513400 | -0.66544100 | H | -6.96949200 | -2.08433000 | 2.05301200  |
| H  | -5.11004400  | -3.09666600 | -0.85480000 | N | -4.66875800 | -1.36459600 | 1.99597900  |
| C  | -1.62232400  | 7.09991000  | -0.95471000 | C | -3.90980300 | -3.44920700 | 1.81982800  |
| C  | -4.52597600  | 1.79286600  | -1.09252200 | N | -3.35817200 | -1.32471700 | 1.92803300  |
| N  | -5.37386800  | -0.19881200 | -0.68495000 | C | -2.84104900 | -2.58081800 | 1.79863400  |
| C  | -1.94350000  | 7.56032100  | 0.32775200  | H | -3.98072100 | -4.52323000 | 1.73951200  |
| H  | -2.10338900  | 8.62563800  | 0.47727000  | C | -1.36728900 | -2.76461400 | 1.61786100  |
| C  | -7.89503600  | -4.53874200 | 0.34429800  | H | -0.83430600 | -2.55356900 | 2.55188700  |
| H  | -8.67715600  | -4.74326200 | 1.06503700  | H | -1.14773200 | -3.78926600 | 1.30814700  |
| C  | -6.77519500  | -3.67189500 | 0.54488700  | H | -6.64417400 | -3.69672500 | 2.69712100  |
| C  | -5.89776000  | 1.92096000  | -1.10640700 | O | -0.93541100 | -1.84309100 | 0.58635200  |
| H  | -6.54967800  | 2.76757400  | -1.25989000 | C | 0.52358100  | -1.66046100 | 0.41476800  |
| C  | -6.63762900  | -4.55542000 | -1.59020700 | C | 1.11638900  | -0.75747900 | 1.48741200  |
| H  | -6.30839500  | -4.75630200 | -2.60117600 | C | 1.28064000  | -2.98855800 | 0.32127800  |
| C  | -7.77120900  | 0.29132900  | -0.55747300 | H | 0.57174500  | -1.16099200 | -0.55874500 |
| H  | -8.36190400  | 1.16289800  | -0.86076700 | C | 2.60251400  | -0.49011400 | 1.18578600  |
| H  | -7.85175900  | 0.20656800  | 0.53133500  | H | 1.00441400  | -1.21195700 | 2.47971200  |
| C  | -1.20990500  | 3.34391600  | -0.22174500 | H | 0.56563600  | 0.19946500  | 1.51027400  |

|   |            |             |             |    |             |             |             |
|---|------------|-------------|-------------|----|-------------|-------------|-------------|
| C | 2.75321100 | -2.71574500 | 0.05394400  | H  | 7.97784800  | -4.01273600 | -0.82046100 |
| H | 0.85850600 | -3.60930700 | -0.47631400 | H  | 8.90486500  | -0.23253900 | -1.13997900 |
| H | 1.16689600 | -3.53913400 | 1.26524500  | C  | 10.51105400 | -0.70540400 | 0.20303900  |
| C | 3.47194600 | -1.77898900 | 1.03065000  | H  | 7.38862900  | -2.76442400 | 2.03065900  |
| H | 3.01450500 | 0.14333700  | 1.97734500  | H  | 8.84669500  | -1.81649800 | 2.30712100  |
| H | 2.66766900 | 0.08660700  | 0.25292100  | H  | 8.87982700  | -3.18308600 | 1.19686100  |
| C | 3.35574200 | -3.29490100 | -0.99444700 | H  | 9.60081500  | -2.08088500 | -2.41366200 |
| C | 4.86732000 | -1.35377000 | 0.44633400  | H  | 10.09322100 | -3.01621600 | -1.01601600 |
| C | 3.61462500 | -2.48135300 | 2.40576900  | C  | 11.60769300 | -0.44222200 | -0.85984700 |
| C | 4.81366200 | -3.16446400 | -1.32006000 | H  | 10.83591300 | -1.57247600 | 0.79838600  |
| H | 2.76304100 | -3.92396900 | -1.65990500 | C  | 10.38308700 | 0.50075500  | 1.14984000  |
| C | 5.63819600 | -2.54573500 | -0.17974300 | H  | 11.59114900 | -1.24515400 | -1.60665700 |
| C | 5.73831700 | -0.56187000 | 1.44924300  | H  | 11.35762200 | 0.48190900  | -1.40429100 |
| H | 4.64747900 | -0.67326600 | -0.39328500 | C  | 13.04187000 | -0.34054400 | -0.31577800 |
| H | 3.95968700 | -1.78632000 | 3.17727800  | H  | 9.96867900  | 1.37154400  | 0.62487300  |
| H | 2.66671800 | -2.90465200 | 2.75502600  | H  | 9.74059900  | 0.28989300  | 2.00954400  |
| H | 4.32957500 | -3.30762200 | 2.34963500  | H  | 11.35827100 | 0.79306300  | 1.55045900  |
| H | 4.91932200 | -2.55341100 | -2.23210600 | C  | 14.08020900 | -0.14796400 | -1.43152800 |
| H | 5.21302900 | -4.15098400 | -1.58871000 | H  | 13.27959500 | -1.25653700 | 0.24617400  |
| C | 7.00480200 | -2.06526800 | -0.68922000 | H  | 13.11761600 | 0.48651300  | 0.39929300  |
| H | 5.78909700 | -3.32057400 | 0.58469500  | H  | 13.95371800 | -0.95112900 | -2.17257500 |
| C | 7.12221800 | -0.16296800 | 0.89581100  | H  | 13.86959900 | 0.79186900  | -1.96543600 |
| H | 5.88538100 | -1.15156300 | 2.36012300  | C  | 15.55137000 | -0.13922500 | -0.96848100 |
| H | 5.21200700 | 0.34956400  | 1.76118400  | C  | 16.49340700 | -0.11429500 | -2.18203000 |
| C | 7.90720400 | -1.38585200 | 0.37932000  | H  | 15.73323100 | -1.07702500 | -0.42055800 |
| C | 7.92981000 | -3.07366000 | -1.38580600 | C  | 15.86550300 | 1.02952200  | -0.02114800 |
| H | 6.78846000 | -1.27620500 | -1.43070900 | H  | 17.54366700 | -0.15101600 | -1.87040500 |
| H | 6.99378100 | 0.55052100  | 0.06864200  | H  | 16.31090500 | -0.96566200 | -2.84865400 |
| H | 7.66541900 | 0.36972400  | 1.68234700  | H  | 16.35316200 | 0.80388400  | -2.76744000 |
| C | 9.17592700 | -1.08117400 | -0.49142800 | H  | 15.66653500 | 1.99254700  | -0.51041700 |
| C | 8.26992200 | -2.34121300 | 1.53841600  | H  | 15.26966000 | 0.99136100  | 0.89739100  |
| C | 9.30678400 | -2.35427800 | -1.39628500 | H  | 16.92156700 | 1.02059500  | 0.27264900  |
| H | 7.58894100 | -3.33037500 | -2.39437300 | Hg | -2.33517500 | 0.17872500  | 0.48871800  |

Cartesian coordinates for the calculated structure of ligand **5.Hg<sup>2+</sup>** (in Å).

|    |             |             |             |   |             |             |             |
|----|-------------|-------------|-------------|---|-------------|-------------|-------------|
| Fe | 7.79436400  | -3.48219700 | 1.15468600  | C | 3.65273100  | -4.21794700 | -1.57873100 |
| C  | 7.50158400  | -5.52397200 | 1.45203000  | N | 3.20477100  | -2.08941200 | -1.88923100 |
| H  | 8.17738900  | -6.15447000 | 2.01462100  | C | 2.62943400  | -3.29746800 | -1.62412200 |
| C  | 8.26082600  | -1.44352200 | 0.96388300  | H | 3.67212900  | -5.28068900 | -1.39074200 |
| C  | 9.34232200  | -2.25953100 | 0.48815100  | C | 1.15271000  | -3.38866300 | -1.40400400 |
| H  | 9.75568500  | -2.24527300 | -0.51302300 | H | 0.61251100  | -3.25072800 | -2.34774600 |
| C  | 9.79372900  | -3.06841100 | 1.56898600  | H | 0.89174100  | -4.36444400 | -0.98702000 |
| H  | 10.58216600 | -3.80774200 | 1.52112200  | H | 6.33840700  | -4.74948400 | -2.39934200 |
| C  | 8.04525300  | -1.76947600 | 2.33879700  | O | 0.78489300  | -2.34621700 | -0.46823200 |
| H  | 7.28537200  | -1.34798000 | 2.98432300  | C | -0.65962500 | -2.07997200 | -0.29328400 |
| O  | 2.44277700  | 2.01817600  | -0.27933500 | C | -1.21756800 | -1.22035500 | -1.41886700 |
| N  | 6.36056500  | 0.17703000  | 0.48277200  | C | -1.48050400 | -3.35957500 | -0.10650900 |
| C  | 8.98863400  | -2.77241500 | 2.70682700  | H | -0.67158100 | -1.51524500 | 0.64506300  |
| H  | 9.05344900  | -3.25323800 | 3.67406800  | C | -2.68793900 | -0.86494800 | -1.13405100 |
| N  | 4.25231200  | 0.05774800  | 0.59114700  | H | -1.12882800 | -1.74062200 | -2.38063300 |
| C  | 5.80918100  | -4.05064700 | 0.91571000  | H | -0.62082100 | -0.29401400 | -1.50165600 |
| H  | 4.97871400  | -3.36454100 | 1.00485700  | C | -2.93936600 | -3.00480700 | 0.13668400  |
| C  | 4.55913300  | 1.38438900  | 0.62584200  | H | -1.08663400 | -3.94164600 | 0.73365900  |
| N  | 5.33652900  | -0.67119100 | 0.48287500  | H | -1.39587900 | -3.98173900 | -1.00809000 |
| C  | 7.58417600  | -5.25583500 | 0.05543900  | C | -3.61499500 | -2.10087500 | -0.90017600 |
| H  | 8.31960500  | -5.66325800 | -0.62728000 | H | -3.07299300 | -0.26288000 | -1.96294600 |
| C  | 6.53282000  | -4.34896100 | -0.28727400 | H | -2.72334600 | -0.22961900 | -0.23838900 |
| C  | 5.93294700  | 1.46899400  | 0.56596300  | C | -3.56963600 | -3.49488200 | 1.21354900  |
| H  | 6.61269800  | 2.30756200  | 0.56627400  | C | -4.99147800 | -1.58102400 | -0.34714500 |
| C  | 6.40360600  | -4.78577700 | 1.98193600  | C | -3.78706200 | -2.88033000 | -2.22964600 |
| H  | 6.09852800  | -4.75623400 | 3.01965100  | C | -5.02287700 | -3.28842000 | 1.51900300  |
| C  | 7.73547600  | -0.28131400 | 0.17218800  | H | -3.00592400 | -4.10580300 | 1.91980000  |
| H  | 8.36515900  | 0.60000600  | 0.33771200  | C | -5.81425800 | -2.70520600 | 0.33729300  |
| H  | 7.75714800  | -0.50088100 | -0.90024400 | C | -5.82417700 | -0.80508200 | -1.39409400 |
| C  | 1.23848900  | 2.89666100  | -0.29112200 | H | -4.74330800 | -0.86730500 | 0.45627500  |
| H  | 0.79217500  | 2.85856100  | 0.70520000  | H | -4.11336300 | -2.22240000 | -3.04087700 |
| H  | 0.58087600  | 2.37587300  | -0.99307900 | H | -2.85519200 | -3.35443900 | -2.55651700 |
| C  | 3.46664700  | 2.40458700  | 0.68023300  | H | -4.52766200 | -3.67819600 | -2.12164600 |
| H  | 3.01539900  | 2.44614600  | 1.67998700  | H | -5.11034500 | -2.62179300 | 2.39324200  |
| H  | 3.84569500  | 3.39657400  | 0.42549600  | H | -5.46238800 | -4.24147200 | 1.84090400  |
| C  | 6.19109700  | -3.92111000 | -1.69931100 | C | -7.16520100 | -2.14757100 | 0.80606700  |
| N  | 4.78308600  | -3.49195800 | -1.80406500 | H | -5.98883300 | -3.51603300 | -0.38379200 |
| H  | 6.77210100  | -3.07062000 | -2.06058000 | C | -7.19645100 | -0.32729400 | -0.87411800 |
| N  | 4.50932700  | -2.20356500 | -1.98002300 | H | -5.98645800 | -1.43110100 | -2.27790500 |

|   |              |             |             |    |              |             |             |
|---|--------------|-------------|-------------|----|--------------|-------------|-------------|
| H | -5.26070900  | 0.06989800  | -1.74345100 | H  | -15.84937200 | -0.84093500 | 0.33098000  |
| C | -8.03210000  | -1.49154500 | -0.30495500 | C  | -15.89609500 | 1.27310100  | -0.04781500 |
| C | -8.13231200  | -3.08481300 | 1.54337900  | H  | -17.64686400 | 0.13886900  | 1.76163000  |
| H | -6.92550700  | -1.32978700 | 1.50834500  | H  | -16.46213300 | -0.73172800 | 2.75086600  |
| H | -7.04706700  | 0.42135000  | -0.08222600 | H  | -16.43579300 | 1.03888200  | 2.68733700  |
| H | -7.71222400  | 0.18599700  | -1.69146700 | H  | -15.67071500 | 2.22299100  | 0.45541300  |
| C | -9.29678600  | -1.09709600 | 0.53621100  | H  | -15.28672000 | 1.22309700  | -0.95692500 |
| C | -8.41962300  | -2.49038000 | -1.41832900 | H  | -16.94663700 | 1.30592900  | -0.35926700 |
| C | -9.48204600  | -2.31720200 | 1.50219600  | Hg | 2.26954200   | -0.37511100 | -0.63137700 |
| H | -7.80984000  | -3.30173200 | 2.56717600  | C  | 1.56472000   | 4.26934600  | -0.76557200 |
| H | -8.20945100  | -4.04918700 | 1.02567000  | C  | 1.76176500   | 4.44470600  | -2.14961000 |
| H | -9.00023700  | -0.22722000 | 1.14424400  | C  | 1.68780300   | 5.38902100  | 0.11198400  |
| C | -10.61085200 | -0.70847900 | -0.19082600 | C  | 2.07466700   | 5.67717100  | -2.68967100 |
| H | -7.54923900  | -2.96705500 | -1.88010400 | H  | 1.64874500   | 3.58729500  | -2.80876200 |
| H | -8.97204600  | -1.98537000 | -2.21762600 | C  | 2.00978400   | 6.66875600  | -0.44963200 |
| H | -9.06099400  | -3.29251100 | -1.04064000 | C  | 1.49965700   | 5.31207400  | 1.53154300  |
| H | -9.77501200  | -1.98203000 | 2.50128100  | C  | 2.20616300   | 6.81249800  | -1.85908100 |
| H | -10.28871900 | -2.96938400 | 1.14825900  | H  | 2.20733800   | 5.78670300  | -3.76208600 |
| C | -11.71089000 | -0.36873900 | 0.84636100  | C  | 2.13415600   | 7.81347800  | 0.39134300  |
| H | -10.95645900 | -1.58900800 | -0.75398600 | C  | 1.62019600   | 6.41459600  | 2.33520400  |
| C | -10.43318300 | 0.45251400  | -1.18444400 | H  | 1.24010200   | 4.36596600  | 1.99421000  |
| H | -11.74271100 | -1.15423800 | 1.61100700  | C  | 2.52036500   | 8.09800600  | -2.39629400 |
| H | -11.42701900 | 0.55534500  | 1.37407800  | C  | 2.44927600   | 9.08793500  | -0.17019100 |
| C | -13.13092800 | -0.21379500 | 0.27810300  | C  | 1.94117400   | 7.69739500  | 1.79901700  |
| H | -10.00396400 | 1.33328900  | -0.68878600 | H  | 1.46233400   | 6.32246200  | 3.40651400  |
| H | -9.78192700  | 0.18797900  | -2.02236400 | C  | 2.63731700   | 9.19354500  | -1.58384100 |
| H | -11.39262000 | 0.75378600  | -1.61527000 | H  | 2.66298600   | 8.19296400  | -3.46887800 |
| C | -14.17912000 | 0.01456800  | 1.37790200  | C  | 2.56364000   | 10.20393700 | 0.68128800  |
| H | -13.39371300 | -1.11941400 | -0.28954000 | C  | 2.06519000   | 8.84204900  | 2.61347100  |
| H | -13.16497400 | 0.61692100  | -0.43568800 | H  | 2.87445200   | 10.16546000 | -2.00765100 |
| H | -14.09636700 | -0.79688400 | 2.11595700  | H  | 2.80271400   | 11.17291100 | 0.25176500  |
| H | -13.94026000 | 0.94244900  | 1.92077400  | C  | 2.37316400   | 10.08065300 | 2.05788100  |
| C | -15.64110900 | 0.08381700  | 0.89155800  | H  | 1.91418200   | 8.74824500  | 3.68544300  |
| C | -16.60115600 | 0.13245600  | 2.09024900  | H  | 2.46374800   | 10.95370400 | 2.69619600  |

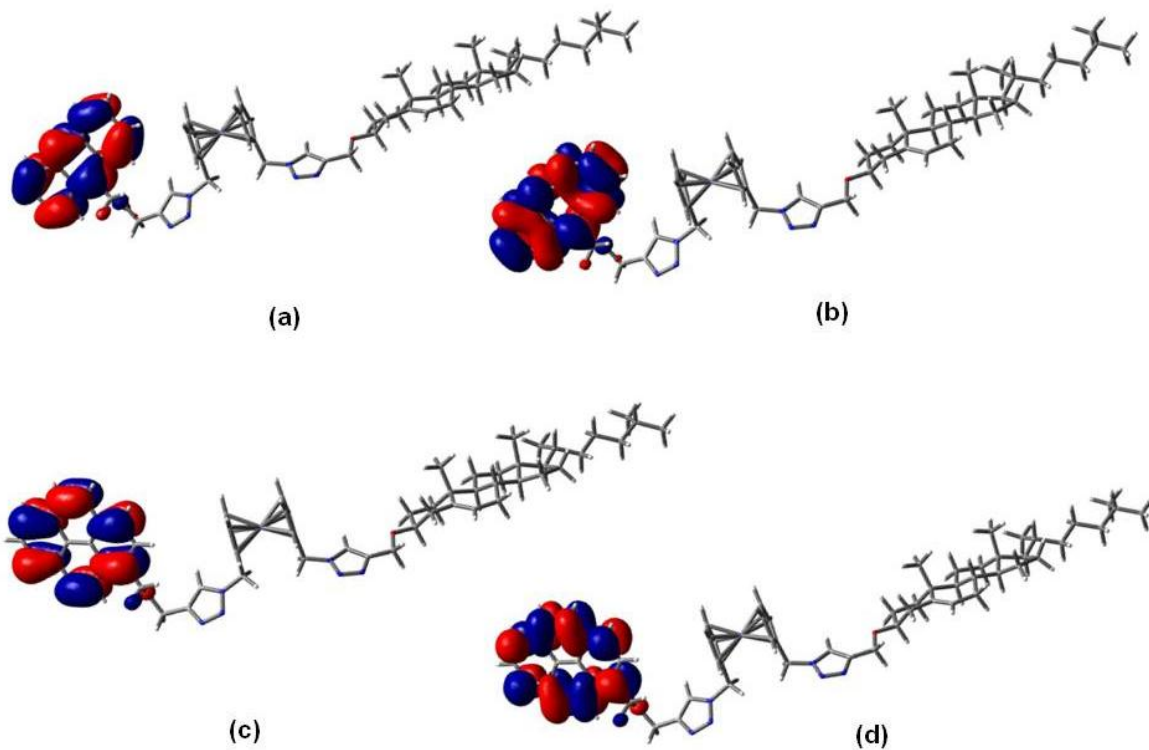

**Figure S12.** Pictorial representation of the molecular orbitals (MOs) present on different fragments of L: (a) HOMO of **4**; (b) LUMO of **4**; (c) HOMO of **5**; (d) LUMO of **5**.

**Table S1.** Distance of metal to donor center and Wiberg Bond Indices (WBI) of **4.Hg<sup>2+</sup>** and **5.Hg<sup>2+</sup>**.

| <b>Compounds</b>               | <b>Distances (Å)</b> | <b>WBI</b> |
|--------------------------------|----------------------|------------|
| <b>4.Hg<sup>2+</sup></b>       |                      |            |
| d <sub>Hg-N</sub>              | 2.36924              | 0.2152     |
| d <sub>Hg-N</sub>              | 2.32286              | 0.2454     |
| d <sub>M-O</sub> (anthracene)  | 2.42524              | 0.2033     |
| d <sub>M-O</sub> (cholesterol) | 2.47307              | 0.1832     |
| <b>5.Hg<sup>2+</sup></b>       |                      |            |
| d <sub>Hg-N</sub>              | 2.36692              | 0.2188     |
| d <sub>Hg-N</sub>              | 2.31916              | 0.2482     |
| d <sub>M-O</sub> (pyrene)      | 2.41847              | 0.2039     |
| d <sub>M-O</sub> (cholesterol) | 2.46102              | 0.1834     |

**Table S2.** DFT calculated energies of HOMO and LUMO (eV), HOMO-LUMO gaps ( $\Delta E = E_{\text{LUMO}} - E_{\text{HOMO}}$ , eV) of **4**, **5**, **4.Hg<sup>2+</sup>** and **5.Hg<sup>2+</sup>**.

| Compound   | <b>4</b> | <b>5</b> | <b>4.Hg<sup>2+</sup></b> | <b>5.Hg<sup>2+</sup></b> |
|------------|----------|----------|--------------------------|--------------------------|
| HOMO       | -5.23    | -5.34    | -9.65                    | -9.59                    |
| LUMO       | -1.64    | -1.49    | -8.93                    | -8.84                    |
| $\Delta E$ | 3.59     | 3.85     | 0.72                     | 0.75                     |

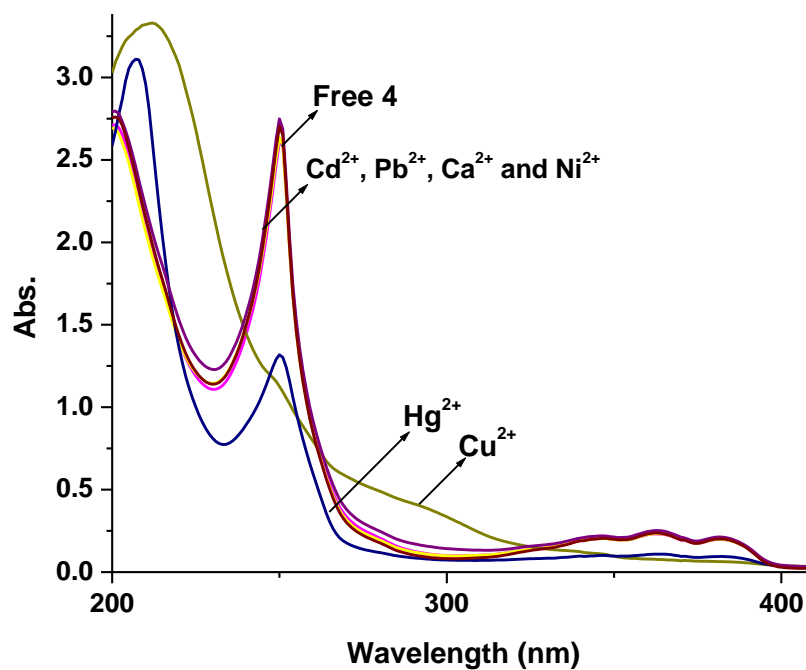

**Figure S13.** Changes in absorption spectra of **4** ( $1 \times 10^{-5}$  M) in CH<sub>3</sub>CN/H<sub>2</sub>O (5:5) upon addition of several metal cations.



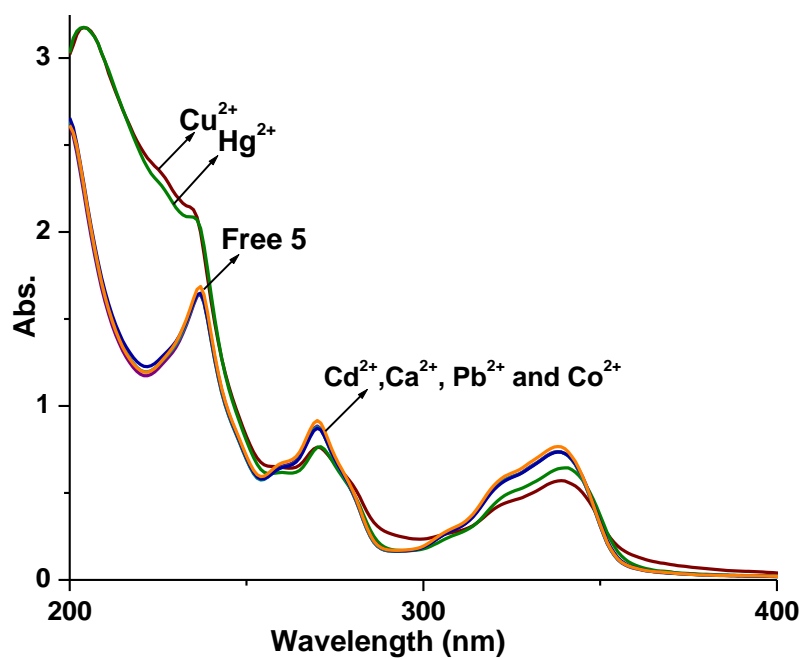

**Figure S14:** Changes in absorption spectra of **5** ( $1 \times 10^{-5}$  M) in  $\text{CH}_3\text{CN}/\text{H}_2\text{O}$  (5:5) upon addition of several metal cations.

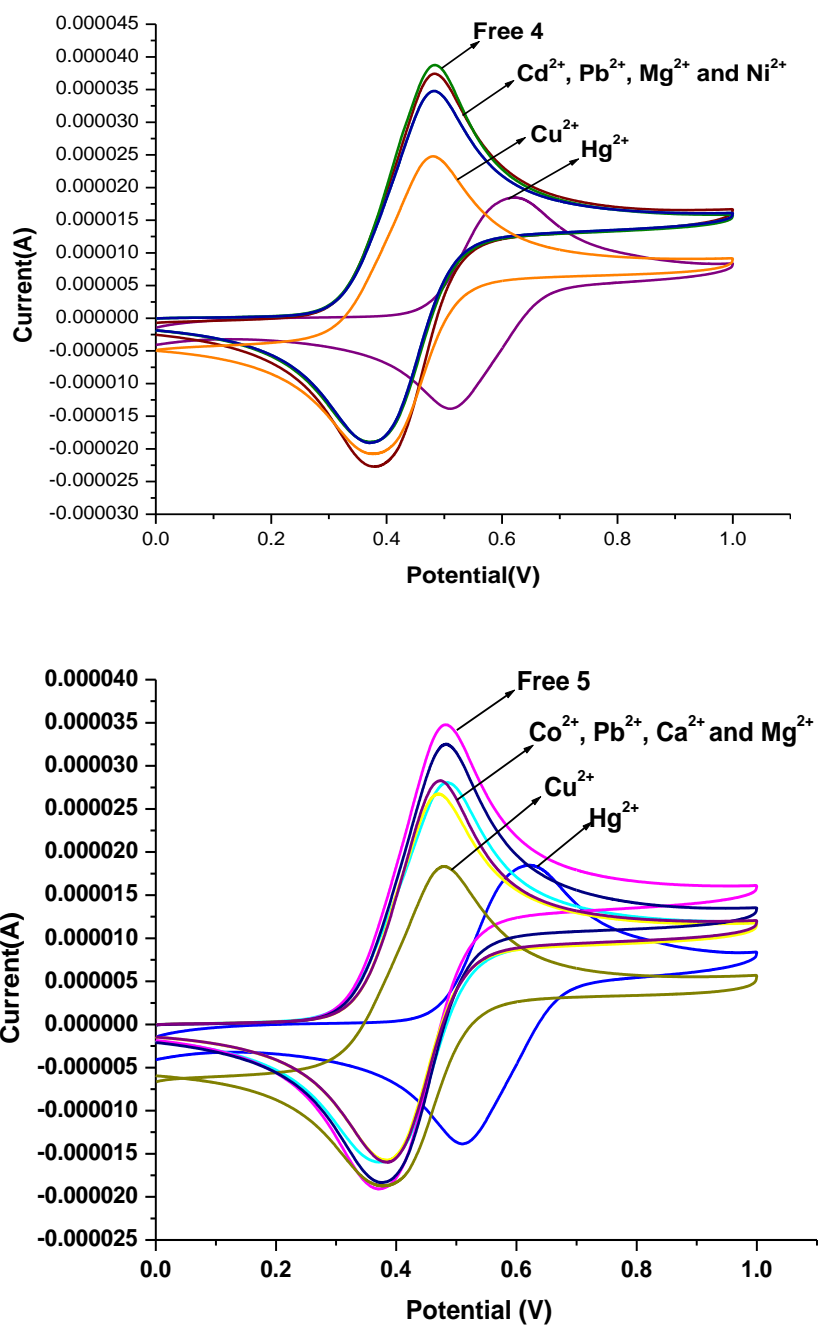

**Figure S15.** Evolution of CV of **4** (top) and **5** (bottom) ( $1 \times 10^{-4}$  M) upon addition of several metal cations upto 1 equiv with  $[(n\text{-Bu})_4\text{N}]\text{ClO}_4$  as supporting electrolyte. Scan rate employed  $0.1 \text{ V s}^{-1}$ .

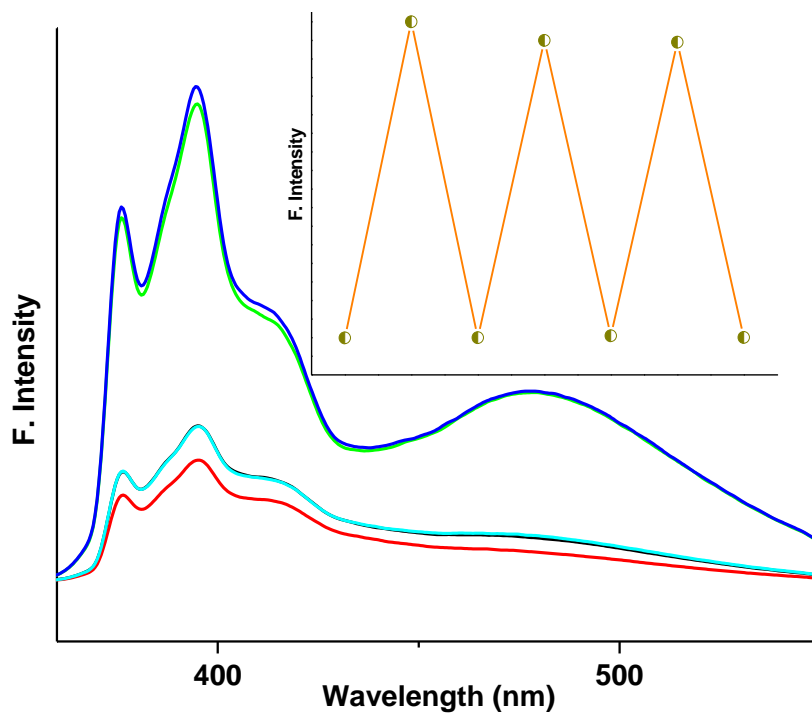

**Figure S16.** Reversibility of the interaction between **5** and  $\text{Hg}^{2+}$  by the introduction of  $\text{I}^-$  to the system. Inset: Stepwise complexation/decomplexation cycles carried out in  $(1 \times 10^{-6} \text{ M})$  ( $\text{CH}_3\text{CN}/\text{H}_2\text{O}$ , 5/5) with **5** and  $\text{Hg}^{2+}$ .

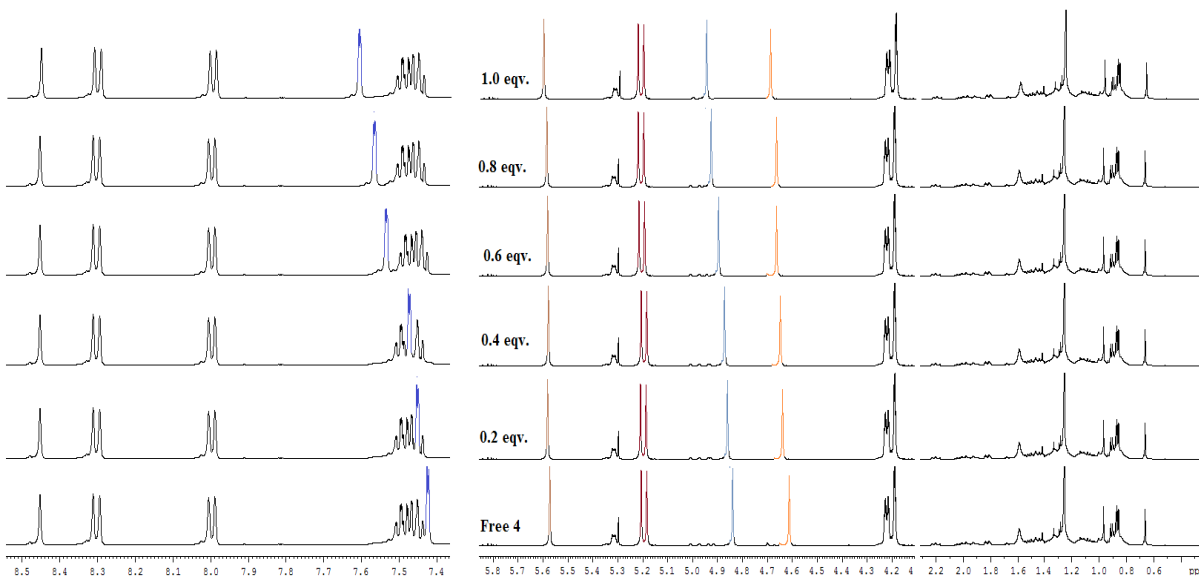

**Figure S17.**  $^1\text{H}$  NMR titration of **4** upon addition of increasing amount of  $\text{Hg}^{2+}$  up to 1 equiv in  $\text{CD}_3\text{CN}$  solution.

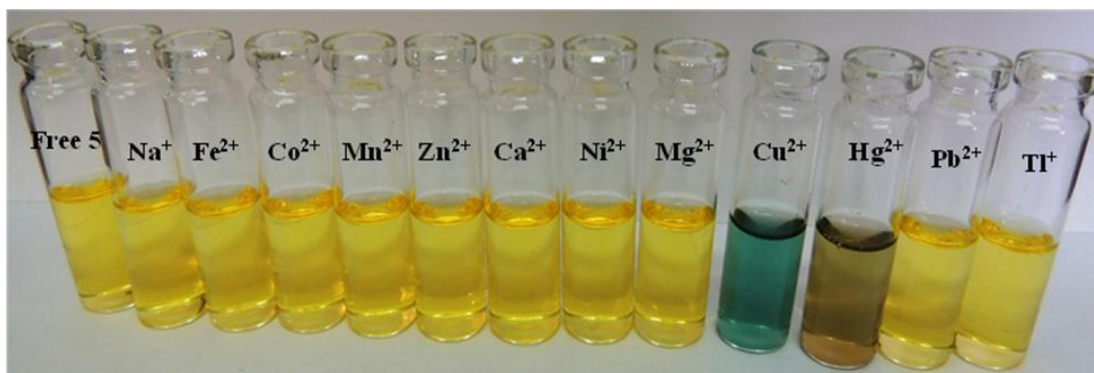

**Figure S18.** Evolution of the color in CH<sub>3</sub>CN solution of **5** ( $10^{-5}$  M) after addition of 5 equiv of different cations tested as perchlorate salt.

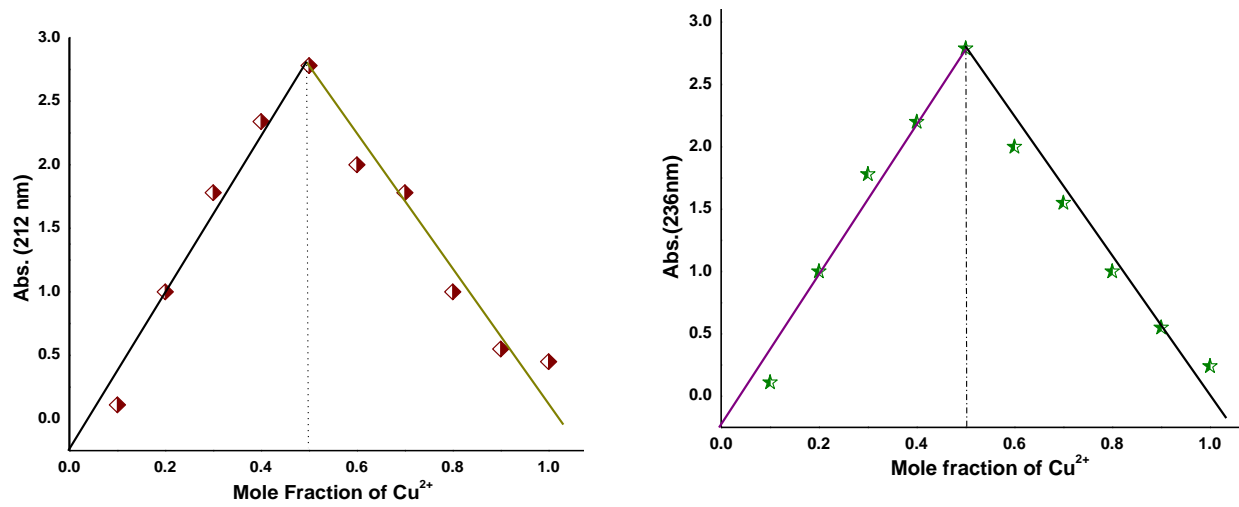

**Figure S19.** Job's plot for compounds **4** and **5** in presence of Cu<sup>2+</sup> ion.

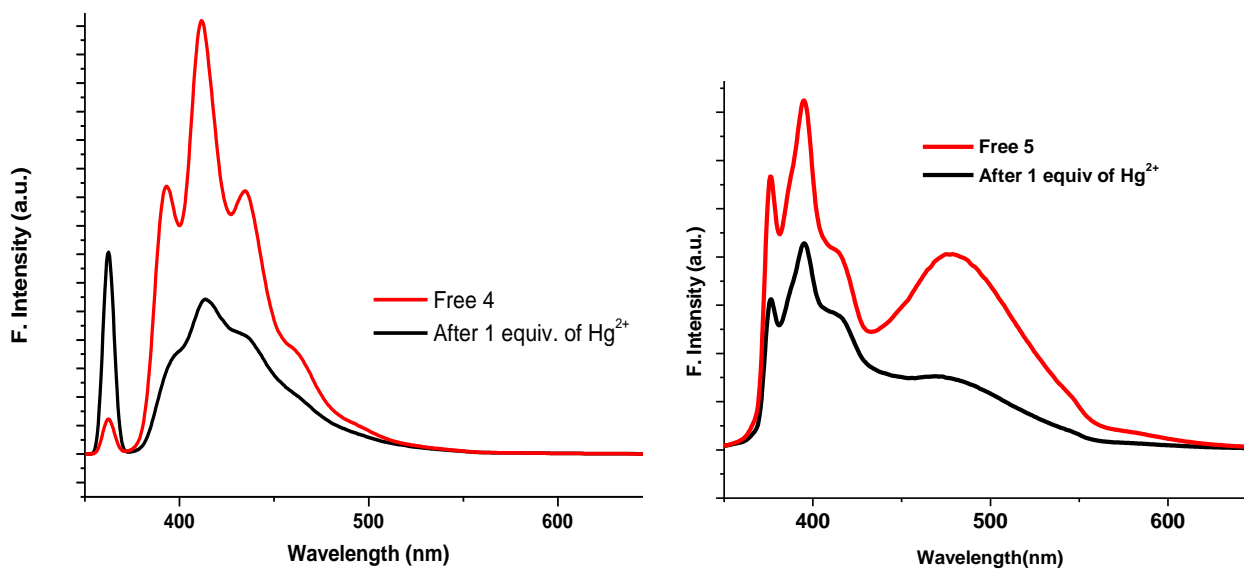

**Figure S20.** Fluorescence emission change of **4** (2 nM) at  $\lambda_{\text{exc}} = 363$  nm (top) and **5** (2nM) at  $\lambda_{\text{exc}} = 345$  nm (bottom) upon addition of Hg<sup>2+</sup> ion upto 1 equiv in CH<sub>3</sub>CN/H<sub>2</sub>O (1/1).

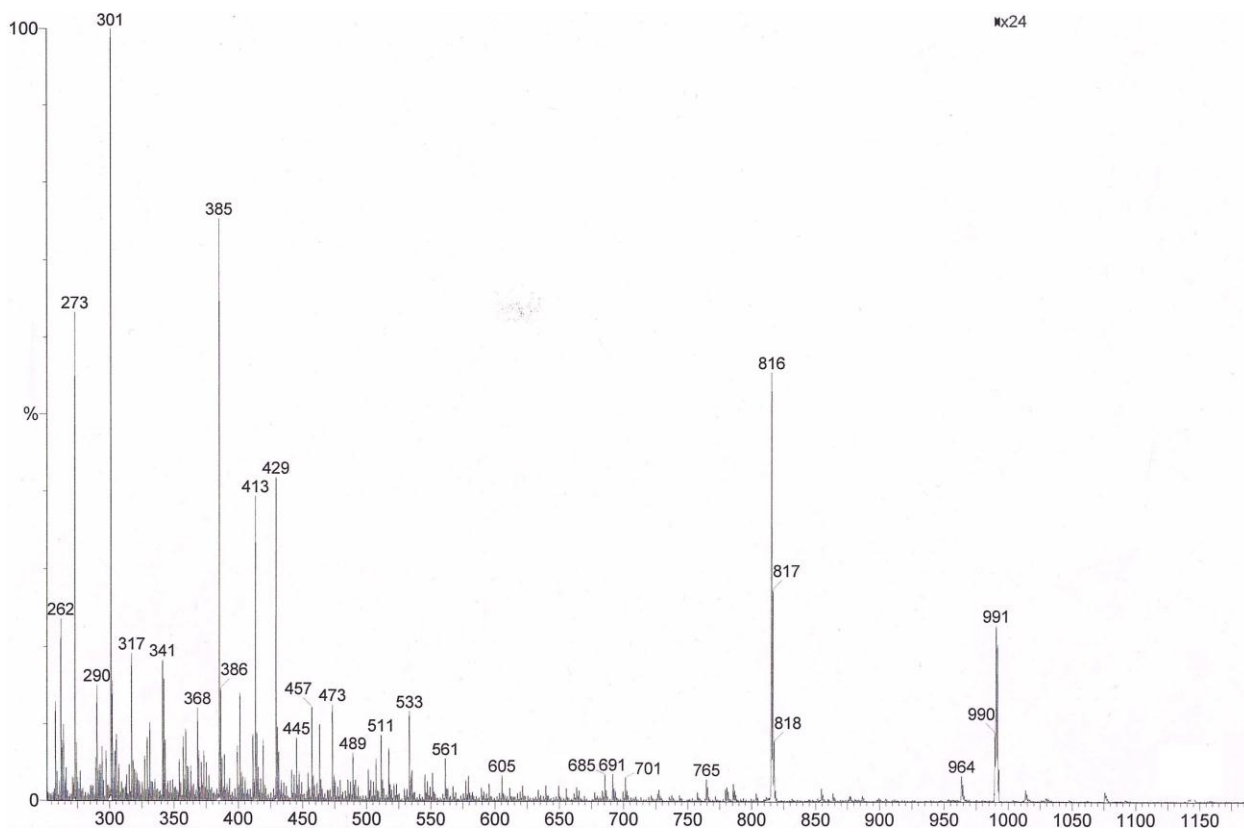

**Figure S21.** Electrospray mass spectrum of **5**.
